# Supplementary material
Source: PubMed Central journal article supplement (PMC6390194)
Supplement: bty073_supplementaryinformation.pdf [file bty073_supplementaryinformation.pdf]

## **SUPPLEMENTARY INFORMATION**

### **HIITE: HIV Incidence and Infection Time Estimator**

Sung Yong Park<sup>1</sup>, Tanzy M. T. Love<sup>2</sup>, Shivankur Kapoor<sup>1</sup> and Ha Youn Lee<sup>1\*</sup>

<sup>1</sup> Department of Molecular Microbiology and Immunology, Keck School of Medicine, University of Southern California, Los Angeles, CA, United States

<sup>2</sup> Department of Biostatistics and Computational Biology, University of Rochester School of Medicine and Dentistry, Rochester, NY, United States

| Subject (Reference)            | Minimum Duration of Infection (days) | Subtype | Risk Behavior | Sex | ART status  | Viral Load (RNA copies/ml) | CD4 Count (cells/mm <sup>3</sup> ) |
|--------------------------------|--------------------------------------|---------|---------------|-----|-------------|----------------------------|------------------------------------|
| <u>Bailey</u> <sup>1</sup>     |                                      |         |               |     |             |                            |                                    |
| DQ410040-DQ410649 <sup>#</sup> |                                      |         |               |     |             |                            |                                    |
| C61                            | 1,798                                | B       | NS            | F   | Naïve       | 19,100                     | 1,261                              |
| C62                            | 2,071                                | B       | NS            | M   | Naïve       | 33,300                     | 481                                |
| C93                            | 1,492                                | B       | NS            | M   | Naïve       | 47,270                     | 402                                |
| C94                            | 1,886                                | B       | NS            | M   | Naïve       | 22,898                     | 351                                |
| C96                            | 1,308                                | B       | NS            | M   | Naïve       | 12,500                     | 400                                |
| C109                           | 882                                  | B       | NS            | F   | Naïve       | 61,000                     | 222                                |
| <u>Yoshida</u> <sup>2</sup>    |                                      |         |               |     |             |                            |                                    |
| AB588196-AB588337              |                                      |         |               |     |             |                            |                                    |
| 7060                           | 1,460                                | B       | MSM           | M   | Naïve       | NS                         | NS                                 |
| 7015                           | 1,460                                | B       | Heterosexual  | NS  | Naïve       | NS                         | NS                                 |
| 6826                           | 1,460                                | B       | MSM           | M   | Naïve       | NS                         | NS                                 |
| 6739                           | 1,460                                | B       | Heterosexual  | NS  | Naïve       | NS                         | NS                                 |
| <u>Ren</u> <sup>3</sup>        |                                      |         |               |     |             |                            |                                    |
| KC807912- KC807980             |                                      |         |               |     |             |                            |                                    |
| GX752                          | 1,095                                | C       | NS            | NS  | Naïve       | NS                         | NS                                 |
| GX757                          | 1,095                                | C       | NS            | NS  | Naïve       | NS                         | NS                                 |
| 0031                           | 1,095                                | R-B/C   | NS            | NS  | Naïve       | NS                         | NS                                 |
| 0651                           | 1,095                                | R-B/C   | NS            | NS  | Naïve       | NS                         | NS                                 |
| 1081                           | 1,095                                | R-B/C   | NS            | NS  | Naïve       | NS                         | NS                                 |
| CNXJ09277                      | 1,095                                | C       | NS            | NS  | Naïve       | NS                         | NS                                 |
| <u>Rong</u> <sup>4</sup>       |                                      |         |               |     |             |                            |                                    |
| GQ485312- GQ485447             |                                      |         |               |     |             |                            |                                    |
| ZM185F                         | 787                                  | C       | Heterosexual  | F   | Naïve       | NS                         | NS                                 |
|                                | 856                                  | C       | Heterosexual  | F   | Naïve       | NS                         | NS                                 |
| <u>Bunnik</u> <sup>5</sup>     |                                      |         |               |     |             |                            |                                    |
| EU743973 -EU744175             |                                      |         |               |     |             |                            |                                    |
| ACH18969                       | 1,430                                | B       | MSM           | M   | Naïve       | NS                         | NS                                 |
|                                | 2,069                                | B       | MSM           | M   | Experienced | NS                         | NS                                 |
|                                | 2,768                                | B       | MSM           | M   | Experienced | NS                         | NS                                 |

|                               |        |   |     |   |             |    |    |
|-------------------------------|--------|---|-----|---|-------------|----|----|
| ACH19542                      | 1,308  | B | MSM | M | Naïve       | NS | NS |
|                               | 1,916  | B | MSM | M | Naïve       | NS | NS |
|                               | 2,616  | B | MSM | M | Experienced | NS | NS |
|                               | 3,559  | B | MSM | M | Experienced | NS | NS |
| ACH19659                      | 913    | B | MSM | M | Naïve       | NS | NS |
|                               | 1,886  | B | MSM | M | Naïve       | NS | NS |
|                               | 2,920  | B | MSM | M | Experienced | NS | NS |
| ACH19768                      | 1,095  | B | MSM | M | Experienced | NS | NS |
|                               | 2,038  | B | MSM | M | Experienced | NS | NS |
|                               | 2,829  | B | MSM | M | Experienced | NS | NS |
|                               | 3,863  | B | MSM | M | Experienced | NS | NS |
|                               | 4,472  | B | MSM | M | Experienced | NS | NS |
| ACH19999                      | 791    | B | MSM | M | Naïve       | NS | NS |
|                               | 2,251  | B | MSM | M | Naïve       | NS | NS |
|                               | 3,285  | B | MSM | M | Experienced | NS | NS |
| <u>Edo-Matas</u> <sup>6</sup> |        |   |     |   |             |    |    |
| EU743973.1-EU744175.1         |        |   |     |   |             |    |    |
| 19383                         | 1,886* | B | MSM | M | Naïve       | NS | NS |
|                               | 3,255* | B | MSM | M | Naïve       | NS | NS |
|                               | 4,045* | B | MSM | M | Naïve       | NS | NS |
| 19417                         | 2,342* | B | MSM | M | Naïve       | NS | NS |
|                               | 3,072* | B | MSM | M | Naïve       | NS | NS |
| 19559                         | 4,045* | B | MSM | M | Naïve       | NS | NS |
| 19576                         | 882*   | B | MSM | M | Naïve       | NS | NS |
|                               | 1,308* | B | MSM | M | Naïve       | NS | NS |
| 19828                         | 1,430* | B | MSM | M | Naïve       | NS | NS |
| 19858                         | 1,278* | B | MSM | M | Naïve       | NS | NS |
|                               | 3,437* | B | MSM | M | Naïve       | NS | NS |
| 19922                         | 2,494* | B | MSM | M | Naïve       | NS | NS |
|                               | 4,106* | B | MSM | M | Naïve       | NS | NS |
| <u>Van-Gils</u> <sup>7</sup>  |        |   |     |   |             |    |    |
| EU744055-EU744096             |        |   |     |   |             |    |    |
| GU455425-GU455525             |        |   |     |   |             |    |    |
| 19298                         | 1,034  | B | MSM | M | Naïve       | NS | NS |
|                               | 1,460  | B | MSM | M | Naïve       | NS | NS |
|                               | 2,190  | B | MSM | M | Experienced | NS | NS |
|                               | 2,647  | B | MSM | M | Experienced | NS | NS |

|       |       |   |     |   |             |    |    |
|-------|-------|---|-----|---|-------------|----|----|
| 19554 | 1,430 | B | MSM | M | Naïve       | NS | NS |
|       | 2,069 | B | MSM | M | Naïve       | NS | NS |
|       | 2,525 | B | MSM | M | Experienced | NS | NS |
|       | 3,255 | B | MSM | M | Experienced | NS | NS |
| 19663 | 1,430 | B | MSM | M | Naïve       | NS | NS |
|       | 2,768 | B | MSM | M | Naïve       | NS | NS |
|       | 3,377 | B | MSM | M | Naïve       | NS | NS |
|       | 4,259 | B | MSM | M | Naïve       | NS | NS |
| 19642 | 882   | B | MSM | M | Naïve       | NS | NS |
|       | 1,491 | B | MSM | M | Naïve       | NS | NS |
|       | 2,251 | B | MSM | M | Naïve       | NS | NS |
|       | 3,285 | B | MSM | M | Naïve       | NS | NS |
|       | 3,985 | B | MSM | M | Naïve       | NS | NS |
|       | 4,320 | B | MSM | M | Naïve       | NS | NS |

Gnanakaran <sup>8</sup>

HQ216367-HQ218052

HQ238279-HQ238288

|          |       |   |              |   |       |        |     |
|----------|-------|---|--------------|---|-------|--------|-----|
| MCST4474 | 3,468 | B | MSM          | M | Naïve | 29,500 | 634 |
| RHGA1581 | 3,468 | B | MSM          | M | Naïve | 25,901 | 571 |
| STCO5453 | 730   | B | MSM          | M | Naïve | 67,964 | 796 |
| WARO5662 | 913   | B | Heterosexual | F | Naïve | 16,758 | 598 |

Keele <sup>9</sup>

EU574937-EU579293

|          |       |   |              |   |       |         |       |
|----------|-------|---|--------------|---|-------|---------|-------|
| CRPE4571 | 730   | B | Heterosexual | F | Naïve | 21,917  | 67    |
| FOJO4081 | 5,718 | B | MSM          | M | Naïve | 73,677  | 408   |
| LAHA4867 | 730   | B | MSM          | M | Naïve | 53,500  | 610   |
| MCRO3633 | 2,738 | B | Heterosexual | F | Naïve | 13,175  | 305   |
| OLLA4645 | 760   | B | Heterosexual | F | Naïve | 382,000 | 150   |
| SAMI4303 | 1,430 | B | MSM          | M | Naïve | 116,000 | 1,012 |
| TALA4022 | 2,525 | B | MSM          | M | Naïve | 228,200 | 8     |
| WICU4248 | 2,160 | B | MSM          | M | Naïve | 8,424   | 564   |
| YOMI4024 | 2,220 | B | MSM          | M | Naïve | 14,178  | 486   |
| UNC3405  | 2,890 | B | MSM          | M | Naïve | 29,100  | 495   |
| UNC5057  | 1,764 | B | Heterosexual | F | Naïve | 141,000 | 277   |
| UNC5417  | 1,156 | B | Heterosexual | M | Naïve | 48,000  | 340   |
| UNC5479  | 1,673 | B | Heterosexual | F | Naïve | 15,400  | 382   |
| UNC5539  | 1,855 | B | MSM          | M | Naïve | 46,600  | 355   |

|                                                       |        |   |                       |    |       |         |       |
|-------------------------------------------------------|--------|---|-----------------------|----|-------|---------|-------|
| UNC5769                                               | 973    | B | MSM                   | M  | Naïve | 18,100  | 466   |
| UNC5791                                               | 1,582  | B | Heterosexual          | F  | Naïve | 65,566  | 262   |
| UNC7092                                               | 5,475  | B | Heterosexual          | F  | Naïve | 64,700  | 333   |
| UNC2009                                               | 1,430  | B | MSM                   | M  | Naïve | 56,000  | 343   |
| UNC4295                                               | 2,707  | B | MSM                   | M  | Naïve | 74,800  | 495   |
| UNC4484                                               | 2,251  | B | Heterosexual          | F  | Naïve | 7,580   | 244   |
| UNC4911                                               | 1,886  | B | Heterosexual          | F  | Naïve | 13,500  | 438   |
| UNC5283                                               | 1,521  | B | Heterosexual          | F  | Naïve | 43,100  | 455   |
| UNC5548                                               | 1,308  | B | Heterosexual          | F  | Naïve | 1,560   | 337   |
| UNC5734                                               | 1,369  | B | Heterosexual<br>, IDU | F  | Naïve | 12,800  | 317   |
| UNC5799                                               | 4,015  | B | MSM                   | M  | Naïve | 81,400  | 211   |
| UNC6064                                               | 1,491  | B | MSM                   | M  | Naïve | 10,400  | 468   |
| SC02                                                  | 1,095  | B | Heterosexual          | M  | Naïve | 76,615  | NS    |
| SC03                                                  | 2,525  | B | Heterosexual          | M  | Naïve | 528,140 | 121   |
| SC05                                                  | 1,977  | B | Heterosexual          | M  | Naïve | 19,514  | NS    |
| SC13                                                  | 973    | B | Heterosexual          | M  | Naïve | 12,054  | NS    |
| SC24                                                  | 1,399  | B | Heterosexual          | M  | Naïve | 178,753 | NS    |
| SC25                                                  | 1,004  | B | Heterosexual          | F  | Naïve | 218,551 | NS    |
| TT31P                                                 | 730    | B | Heterosexual          | F  | Naïve | 19,909  | 525   |
| <u>Herbeck</u> <sup>10</sup>                          |        |   |                       |    |       |         |       |
| JN024459-JN024468                                     |        |   |                       |    |       |         |       |
| PIC51550                                              | 3,285  | B | MSM                   | M  | Naïve | 28,610  | NS    |
| <u>Herbeck</u> <sup>10</sup> <u>Liu</u> <sup>11</sup> |        |   |                       |    |       |         |       |
| DQ853426-DQ854622                                     |        |   |                       |    |       |         |       |
| PIC1365                                               | 3,653* | B | MSM                   | M  | Naïve | NS      | NS    |
| <u>Daniels</u> <sup>12</sup>                          |        |   |                       |    |       |         |       |
| AJ535590-AJ535607                                     |        |   |                       |    |       |         |       |
| Pat-1                                                 | 3,285  | B | NS                    | M  | Naïve | NS      | 220   |
| Pat-2                                                 | 5,476  | B | NS                    | M  | Naïve | NS      | 170   |
| <u>Doria-Rose</u> <sup>13</sup>                       |        |   |                       |    |       |         |       |
| KF996701-KF996716                                     |        |   |                       |    |       |         |       |
| CAP256                                                | 1,233  | C | Heterosexual          | F  | Naïve | NS      | NS    |
| <u>Wu</u> <sup>14</sup>                               |        |   |                       |    |       |         |       |
| JQ609684-JQ610156                                     |        |   |                       |    |       |         |       |
| 1                                                     | 3,650  | B | NS                    | NS | Naïve | 14,650  | 1,160 |
|                                                       | 5,840  | B | NS                    | NS | Naïve | 10,526  | 568   |

|                                                    |        |     |              |    |             |         |     |
|----------------------------------------------------|--------|-----|--------------|----|-------------|---------|-----|
|                                                    | 7,665  | B   | NS           | NS | Experienced | 19,260  | 545 |
| 18                                                 | 2,920  | B   | NS           | NS | Naïve       | 24,648  | 462 |
| 45                                                 | 4,015  | B   | NS           | NS | Naïve       | 11,416  | 727 |
|                                                    | 5,840  | B   | NS           | NS | Naïve       | 9,129   | 638 |
|                                                    | 6,935  | B   | NS           | NS | Naïve       | 5,153   | 686 |
| N26                                                | 7,665  | B   | NS           | NS | Naïve       | 35,912  | 387 |
| N90                                                | 8395   | B   | NS           | NS | Naïve       | 8,216   | 912 |
| <u>Blish<sup>15</sup>, Piantadosi<sup>16</sup></u> |        |     |              |    |             |         |     |
| FJ396012-FJ396031                                  |        |     |              |    |             |         |     |
| EU163983-EU164399                                  |        |     |              |    |             |         |     |
| QA413                                              | 1,007  | A   | Heterosexual | F  | Naïve       | NS      | 296 |
|                                                    | 1,146* | A   | Heterosexual | F  | Naïve       | NS      | NS  |
|                                                    | 1,346* | A   | Heterosexual | F  | Naïve       | NS      | NS  |
| <u>Geels<sup>17</sup></u>                          |        |     |              |    |             |         |     |
| AY423381-AY423387                                  |        |     |              |    |             |         |     |
| H671                                               | 1,430  | B   | MSM          | M  | Naïve       | NS      | NS  |
| <u>Sturdevant<sup>18</sup></u>                     |        |     |              |    |             |         |     |
| KM353586-KM355197                                  |        |     |              |    |             |         |     |
| 9018                                               | 873    | B   | NS           | NS | Experienced | 89,125  | 453 |
|                                                    | 980    | B   | NS           | NS | Experienced | 95,499  | 505 |
| 9040                                               | 753    | B   | NS           | NS | Naïve       | 275,422 | 279 |
| <u>SSemwanga<sup>19</sup></u>                      |        |     |              |    |             |         |     |
| HM027653-HM027878                                  |        |     |              |    |             |         |     |
| PP1_F1                                             | 883    | D   | Heterosexual | F  | NS          | NS      | NS  |
| PP1_F3                                             | 2,312  | D   | Heterosexual | F  | NS          | NS      | NS  |
| PP1_F4                                             | 2,570  | A/D | Heterosexual | F  | NS          | NS      | NS  |
| PP1_M                                              | 2,824  | D   | Heterosexual | M  | NS          | NS      | NS  |
| <u>Skar<sup>20</sup></u>                           |        |     |              |    |             |         |     |
| JN251812-JN251888                                  |        |     |              |    |             |         |     |
| 45755                                              | 2,555  | B   | NS           | M  | Naïve       | 832     | NS  |
|                                                    | 2,556  | B   | NS           | M  | Naïve       | 794     | NS  |
|                                                    | 2,557  | B   | NS           | M  | Naïve       | 1220    | NS  |
|                                                    | 2,565  | B   | NS           | M  | Naïve       | 563     | NS  |
|                                                    | 2,572  | B   | NS           | M  | Naïve       | 518     | NS  |
|                                                    | 2,579  | B   | NS           | M  | Naïve       | 450     | NS  |
|                                                    | 2,586  | B   | NS           | M  | Naïve       | 600     | NS  |

|                                   |        |     |              |    |             |        |     |
|-----------------------------------|--------|-----|--------------|----|-------------|--------|-----|
|                                   | 3,076  | B   | NS           | M  | Naïve       | NS     | NS  |
| <u>Ping</u> <sup>21</sup>         |        |     |              |    |             |        |     |
| KC862610-KC863648                 |        |     |              |    |             |        |     |
| HM638963-HM639197                 |        |     |              |    |             |        |     |
| CAP61                             | 835    | C   | Heterosexual | F  | NS          | NS     | NS  |
| DUI23                             | 1,702  | C   | Heterosexual | F  | NS          | NS     | NS  |
| <u>Mukhopadhyay</u> <sup>22</sup> |        |     |              |    |             |        |     |
| FJ515874-FJ515878                 |        |     |              |    |             |        |     |
| JN400538-JN400545                 |        |     |              |    |             |        |     |
| 991566                            | 2,920  | B/C | NS           | NS | Naïve       | NS     | 720 |
| <u>Malherbe</u> <sup>23</sup>     |        |     |              |    |             |        |     |
| KJ698244-KJ698348                 |        |     |              |    |             |        |     |
| VC10014                           | 1,037  | B   | Heterosexual |    | Naïve       | NS     | NS  |
|                                   | 1,310  | B   | Heterosexual |    | Naïve       | NS     | NS  |
| VC20013                           | 774    | B   | NS           |    | Naïve       | NS     | NS  |
| <u>Evering</u> <sup>24</sup>      |        |     |              |    |             |        |     |
| KM258899 - KM259615               |        |     |              |    |             |        |     |
| NCN1                              | 1,813  | B   | MSM          | M  | Experienced | 65,600 | 591 |
| NCN2                              | 5,265  | B   | MSM          | M  | Naïve       | 749    | 802 |
| NCN3                              | 1,488  | B   | MSM          | M  | Experienced | 8,620  | 687 |
| NCN4                              | 6,521  | B   | MSM          | M  | Naïve       | 13,900 | 790 |
| NCN5                              | 2,291  | B   | MSM          | M  | Naïve       | 19,700 | 420 |
| NCN6                              | 4,166  | B   | MSM          | M  | Experienced | 18,900 | 418 |
| ANI1                              | 4,688  | B   | MSM          | M  | Naïve       | 5,320  | 743 |
| ANI2                              | 6,440  | B   | MSM          | M  | Experienced | 29,800 | 220 |
| ANI3                              | 1,405  | B   | MSM          | M  | Naïve       | 1,890  | 819 |
| ANI4                              | 1,709  | B   | MSM          | M  | Naïve       | 38,600 | 237 |
| ANI5                              | 806    | B   | MSM          | M  | Naïve       | 9,210  | 244 |
| ANI6                              | 1,817  | B   | MSM          | M  | Experienced | 13,000 | 329 |
| ANI7                              | 6,284  | B   | MSM          | M  | Experienced | 50,100 | 466 |
| MND1                              | 2,282  | B   | MSM          | M  | Naïve       | 6,250  | 398 |
| MND2                              | 1,780  | B   | Heterosexual | F  | Experienced | 44,900 | 320 |
| <u>Shankarappa</u> <sup>25</sup>  |        |     |              |    |             |        |     |
| <u>Jensen</u> <sup>26</sup>       |        |     |              |    |             |        |     |
| AF137629-AF138703                 |        |     |              |    |             |        |     |
| AY348333-AY450257                 |        |     |              |    |             |        |     |
| p1                                | 1,044* | B   | MSM          | M  | Naïve       | 13,243 | 845 |
|                                   | 1,369* | B   | MSM          | M  | Naïve       | 53,211 | 755 |

|        |        |        |     |     |             |         |        |
|--------|--------|--------|-----|-----|-------------|---------|--------|
| p2     | 1,544* | B      | MSM | M   | Naïve       | 13,614  | 463    |
|        | 1,851* | B      | MSM | M   | Naïve       | 11,455  | 484    |
|        | 1,993* | B      | MSM | M   | Naïve       | 17,258  | 534    |
|        | 2,081* | B      | MSM | M   | Naïve       | NS      | 524    |
|        | 2,354* | B      | MSM | M   | Naïve       | 103,039 | 505    |
|        | 2,435* | B      | MSM | M   | Naïve       | 206,063 | 147    |
|        | 2,657* | B      | MSM | M   | Naïve       | 53,333  | 44     |
|        | 2,851* | B      | MSM | M   | Naïve       | 107,152 | 59     |
|        | 2,982* | B      | MSM | M   | Naïve       | 20,230  | 27     |
|        | 3,194* | B      | MSM | M   | Naïve       | 41,020  | 42     |
|        | 927*   | B      | MSM | M   | Naïve       | 6,067   | 1,579  |
|        | 1,205* | B      | MSM | M   | Naïve       | 3,532   | 1,556  |
|        | 1,566* | B      | MSM | M   | Naïve       | 220,293 | 1,784  |
|        | 1,843* | B      | MSM | M   | Naïve       | 46,774  | 1,667  |
|        | 2,070* | B      | MSM | M   | Naïve       | 34,995  | 1,710  |
|        | 2,230* | B      | MSM | M   | Naïve       | 48,753  | 1,654  |
|        | 2,420* | B      | MSM | M   | Naïve       | 202,768 | 1,112  |
|        | 2,595* | B      | MSM | M   | Naïve       | 345,939 | 693    |
|        | 2,763* | B      | MSM | M   | Naïve       | 269,153 | 470    |
|        | p3     | 3,139* | B   | MSM | M           | Naïve   | 83,176 |
| 3,829* |        | B      | MSM | M   | Experienced | 163,682 | 100    |
| 785*   |        | B      | MSM | M   | Naïve       | 6,237   | 686    |
| 920*   |        | B      | MSM | M   | Naïve       | 7,709   | 576    |
| 1,292* |        | B      | MSM | M   | Naïve       | 1,282   | 672    |
| 1,668* |        | B      | MSM | M   | Naïve       | 17,783  | 734    |
| 2,033* |        | B      | MSM | M   | Naïve       | 2,466   | 624    |
| 2,219* |        | B      | MSM | M   | Naïve       | 19,953  | 367    |
| 2,424* |        | B      | MSM | M   | Experienced | 117,490 | 254    |
| 2,935* |        | B      | MSM | M   | Experienced | 59,429  | NS     |
| p4     | 821*   | B      | MSM | M   | NS          | 16,218  | 513    |
|        | 989*   | B      | MSM | M   | NS          | 3,715   | 529    |
|        | 1,164* | B      | MSM | M   | NS          | 72,277  | 411    |
|        | 1,278* | B      | MSM | M   | NS          | NS      | 387    |
|        | 1,453* | B      | MSM | M   | NS          | 91201   | 278    |
|        | 1,599* | B      | MSM | M   | NS          | 62087   | 370    |
|        | 1,796* | B      | MSM | M   | NS          | 4667    | 280    |
|        | 1,971* | B      | MSM | M   | NS          | 209411  | 278    |



|    |        |   |     |   |             |         |     |
|----|--------|---|-----|---|-------------|---------|-----|
| p5 | 2,154* | B | MSM | M | NS          | 254097  | 189 |
|    | 2,321* | B | MSM | M | NS          | 130017  | 47  |
|    | 2,712* | B | MSM | M | NS          | 232809  | 8   |
|    | 843*   | B | MSM | M | Naïve       | 66,834  | 742 |
|    | 1,029* | B | MSM | M | Naïve       | 16,904  | 692 |
|    | 1,223* | B | MSM | M | Naïve       | 101,625 | 500 |
|    | 1,318* | B | MSM | M | Naïve       | 32,137  | 869 |
|    | 1,497* | B | MSM | M | Naïve       | 21,330  | 615 |
|    | 1,701* | B | MSM | M | Naïve       | 26,485  | 498 |
|    | 1,894* | B | MSM | M | Naïve       | 77,268  | 334 |
| p6 | 2,070* | B | MSM | M | Naïve       | 182,390 | 241 |
|    | 2,456* | B | MSM | M | Experienced | 41,591  | 18  |
|    | 730*   | B | MSM | M | Naïve       | 57,943  | 526 |
|    | 902*   | B | MSM | M | Naïve       | 53,211  | 404 |
|    | 1,080* | B | MSM | M | Naïve       | 133,968 | 371 |
|    | 1,263* | B | MSM | M | Naïve       | 228,034 | 291 |
|    | 1,445* | B | MSM | M | Experienced | 240,991 | 311 |
|    | 1,628* | B | MSM | M | Experienced | 240,991 | 276 |
|    | 2,208* | B | MSM | M | Experienced | 263,027 | 24  |
|    | 763*   | B | MSM | M | Naïve       | 6,823   | 739 |
| p7 | 931*   | B | MSM | M | Naïve       | 21,577  | 685 |
|    | 1,343* | B | MSM | M | Naïve       | 21,979  | 460 |
|    | 1,518* | B | MSM | M | Experienced | 9,162   | 543 |
|    | 1,690* | B | MSM | M | Experienced | 124,738 | 494 |
|    | 1,872* | B | MSM | M | Experienced | 50,234  | 537 |
|    | 2,252* | B | MSM | M | Experienced | 42,855  | 373 |
|    | 2,438* | B | MSM | M | Experienced | 76,384  | 237 |
|    | 876*   | B | MSM | M | Naïve       | 9,441   | 545 |
|    | 1,066* | B | MSM | M | Naïve       | 7,194   | 448 |
|    | 1,234* | B | MSM | M | Naïve       | 35,075  | 591 |
| p8 | 1,409* | B | MSM | M | Naïve       | 21,577  | 463 |
|    | 1,617* | B | MSM | M | Naïve       | 22,594  | 359 |
|    | 1,799* | B | MSM | M | Naïve       | 35,400  | 410 |
|    | 1,989* | B | MSM | M | Naïve       | 113,763 | 278 |
|    | 2,143* | B | MSM | M | Naïve       | 28,445  | 259 |
|    | 2,456* | B | MSM | M | Experienced | 17,783  | 55  |
|    | 2,887* | B | MSM | M | Experienced | 23,335  | 87  |

|                           |        |   |              |   |             |         |       |
|---------------------------|--------|---|--------------|---|-------------|---------|-------|
| p9                        | 1,172* | B | MSM          | M | Naïve       | 8,204   | 625   |
|                           | 1,905* | B | MSM          | M | Experienced | 528     | 1,115 |
|                           | 2,621* | B | MSM          | M | Experienced | 4,477   | 1,295 |
|                           | 3,172* | B | MSM          | M | Experienced | 12,735  | 947   |
|                           | 3,362* | B | MSM          | M | Experienced | 29,717  | NS    |
|                           | 3,544* | B | MSM          | M | Experienced | 73,451  | 549   |
|                           | 3,712* | B | MSM          | M | Experienced | 73,451  | 258   |
|                           | 3,909* | B | MSM          | M | Experienced | 201,837 | 612   |
|                           | 4,084* | B | MSM          | M | Experienced | 333,426 | 202   |
| p10                       | 785*   | B | MSM          | M | NS          | 802     | 1,588 |
|                           | 975*   | B | MSM          | M | NS          | 575     | 1,615 |
|                           | 1,336* | B | MSM          | M | NS          | 3192    | 1,681 |
|                           | 1,511* | B | MSM          | M | NS          | NS      | 1,740 |
|                           | 1,891* | B | MSM          | M | NS          | NS      | 1,062 |
|                           | 2,051* | B | MSM          | M | NS          | NS      | 1,260 |
|                           | 2,241* | B | MSM          | M | NS          | NS      | 1,140 |
|                           | 2,424* | B | MSM          | M | NS          | NS      | 1,019 |
|                           | 2,602* | B | MSM          | M | NS          | 11,041  | 1,095 |
|                           | 2,792* | B | MSM          | M | NS          | NS      | 953   |
|                           | 3,362* | B | MSM          | M | NS          | NS      | 1,030 |
|                           | 3,548* | B | MSM          | M | NS          | NS      | 774   |
|                           | 4,081* | B | MSM          | M | NS          | NS      | 885   |
|                           | 4,263* | B | MSM          | M | NS          | NS      | 805   |
|                           | 4,464* | B | MSM          | M | NS          | 759     | 808   |
|                           | 4,668* | B | MSM          | M | NS          | 437     | 789   |
|                           | 4,811* | B | MSM          | M | NS          | 564     | 779   |
| p11                       | 883*   | B | MSM          | M | Naïve       | 741     | 831   |
|                           | 1,270* | B | MSM          | M | Naïve       | 490     | 840   |
|                           | 1,763* | B | MSM          | M | Naïve       | 468     | 1,230 |
|                           | 2,128* | B | MSM          | M | Naïve       | 1,778   | 1,118 |
|                           | 3,030* | B | MSM          | M | Naïve       | NS      | 823   |
| <u>Park</u> <sup>27</sup> |        | B |              |   |             |         |       |
| KF945693-KF945994         |        |   |              |   |             |         |       |
| PL7408                    | 749*   | B | MSM          | M | Naïve       | 507     | 840   |
| IJ7234                    | 2,984* | B | MSM          | M | Naïve       | 5,599   | 364   |
| QZ8149                    | 3,216* | B | Heterosexual | F | Naïve       | 15,000  | 542   |
| LE2707                    | 2,407* | B | Heterosexual | F | Naïve       | 1,394   | 607   |

|                           |        |       |              |   |             |         |     |
|---------------------------|--------|-------|--------------|---|-------------|---------|-----|
| CX7332                    | 5,464* | B     | Heterosexual | M | Experienced | 389,081 | 63  |
| KI6633                    | 2,428* | B     | Heterosexual | M | Experienced | 460,004 | 115 |
| CF6610                    | 3,710* | B     | MSM          | M | Experienced | 17,001  | 634 |
| <u>Liao</u> <sup>28</sup> |        |       |              |   |             |         |     |
| KC247403-KC247483         |        |       |              |   |             |         |     |
| CH505                     | 924    | C     | Heterosexual | M | Naive       | 51,554  | 294 |
|                           | 1,092  | C     | Heterosexual | M | Naive       | 110,230 | 339 |
| <u>Park</u> <sup>29</sup> |        |       |              |   |             |         |     |
| MF537774-MF538517         |        |       |              |   |             |         |     |
| TY2947                    | 732*   | B     | NS           | F | Naive       | 6400    | 767 |
|                           | 1,105* | B     | NS           | F | Naive       | 8500    | 631 |
| RH7057                    | 733*   | B     | NS           | F | Experienced | 4800    | 374 |
|                           | 1,126* | B     | NS           | F | Experienced | 3200    | 359 |
| IS5366                    | 1,085* | B     | NS           | F | Naive       | 1100    | 125 |
| GE6106                    | 1,133* | B     | IDU          | F | Naive       | 160000  | 431 |
| UN2011                    | 1,079* | B     | IDU          | F | Experienced | 3800    | 458 |
| OY9080                    | 1,087* | B     | Heterosexual | F | Naive       | 34000   | 308 |
| DA1342                    | 789*   | B     | NS           | F | Naive       | 1505    | 359 |
|                           | 1,070* | B     | NS           | F | Naive       | 1900    | 367 |
| SI1392                    | 739*   | R-A/G | NS           | F | Experienced | 1148    | 357 |
|                           | 1,028* | R-A/G | NS           | F | Experienced | 4300    | 227 |
|                           | 1,182* | R-A/G | NS           | F | Experienced | 6100    | 245 |
| CC2874                    | 1,103* | B     | NS           | F | Naive       | 11000   | 252 |
| PR4290                    | 879*   | B     | NS           | F | Naive       | 1530    | 368 |
| XE9655                    | 844*   | B     | NS           | F | Naive       | 36000   | 444 |
| FQ2419                    | 756*   | B     | IDU          | F | Experienced | 47000   | 327 |
|                           | 1,134* | B     | IDU          | F | Experienced | 32000   | 301 |
| NM1689                    | 775*   | B     | IDU          | F | Experienced | 12000   | 646 |
|                           | 1,197* | B     | IDU          | F | Experienced | 1600000 | 658 |
| SS0342                    | 1,292* | B     | IDU          | F | Experienced | 8700    | 173 |
| BQ7042                    | 1,035* | B     | IDU          | F | Experienced | 9400    | 630 |
| EJ7211                    | 1,044* | B     | Heterosexual | F | Naive       | 33000   | 683 |

**Table S1. 297 Chronic specimens.** NS, not stated in original publication; Naive, subject has not received ART; Experienced, patient currently or previously received ART; MSM, men who have sex with men; IDU, intravenous drug user. \*Only HXB2 7134-7499 segment is available. #Genbank accession numbers

| Subject (Reference)                                    | Estimated Days Post Infection | Fiebig Stage | Subtype | Risk Behavior | Sex | ART status | Viral Load (RNA copies/ml) | CD4 Count (cells/mm <sup>3</sup> ) |
|--------------------------------------------------------|-------------------------------|--------------|---------|---------------|-----|------------|----------------------------|------------------------------------|
| <u>Baalwa</u> <sup>30</sup> , <u>Yue</u> <sup>31</sup> |                               |              |         |               |     |            |                            |                                    |
| JX877476-JX877521                                      |                               |              |         |               |     |            |                            |                                    |
| KP223729-KP223854                                      |                               |              |         |               |     |            |                            |                                    |
| KJ190253-KJ190262                                      |                               |              |         |               |     |            |                            |                                    |
| 190049                                                 | 19.5 [13, 34]                 | I/II         | D       | Heterosexual  | F   | Naïve      | 38,266,666                 | NS                                 |
| 191084                                                 | 31 [27, 43]                   | IV           | A       | Heterosexual  | F   | Naïve      | 34,600                     | NS                                 |
| 191727                                                 | 31 [27, 43]                   | IV           | D       | Heterosexual  | F   | Naïve      | 15,200                     | NS                                 |
| 191845                                                 | 31 [27, 43]                   | IV           | A       | Heterosexual  | F   | Naïve      | 31,200                     | NS                                 |
| 191859                                                 | 17 [13, 28]                   | I            | D       | Heterosexual  | F   | Naïve      | 53,334                     | NS                                 |
| 191882                                                 | 17 [13, 28]                   | I            | D       | Heterosexual  | M   | Naïve      | 15,378                     | NS                                 |
| 191947                                                 | 17 [13, 28]                   | I            | R-A/D   | Heterosexual  | M   | Naïve      | 5,466                      | NS                                 |
| 191982                                                 | 17 [13, 28]                   | I            | A/D     | Heterosexual  | F   | Naïve      | 7,156                      | NS                                 |
| <u>Chen</u> <sup>32</sup>                              |                               |              |         |               |     |            |                            |                                    |
| KM217584-KM218333                                      |                               |              |         |               |     |            |                            |                                    |
| BJOX23                                                 | 31 [27, 43]                   | IV           | R-A/E   | MSM           | M   | Naïve      | 4,380,000                  | NS                                 |
| BJOX35                                                 | 19.5 [13, 34]                 | I/II         | B       | MSM           | M   | Naïve      | 11,600                     | NS                                 |
| BJOX19                                                 | 19.5 [13, 34]                 | I/II         | R-B/C   | MSM           | M   | Naïve      | 330,000                    | NS                                 |
| BJOX20                                                 | 19.5 [13, 34]                 | I/II         | B       | MSM           | M   | Naïve      | 64,700                     | NS                                 |
| BJOX15                                                 | 19.5 [13, 34]                 | I/II         | R-A/E   | MSM           | M   | Naïve      | 1,180,000                  | NS                                 |
| BJOX03                                                 | 19.5 [13, 34]                 | I/II         | B       | MSM           | M   | Naïve      | 2,150,000                  | NS                                 |
| BJOX22                                                 | 31 [27, 43]                   | IV           | B       | MSM           | M   | Naïve      | 322,000                    | NS                                 |
| BJOX05                                                 | 19.5 [13, 34]                 | I/II         | R-A/E   | MSM           | M   | Naïve      | 30,211                     | NS                                 |
| BJOX06                                                 | 31 [27, 43]                   | IV           | B       | MSM           | M   | Naïve      | 498,947                    | NS                                 |
| BJOX25                                                 | 19.5 [13, 34]                 | I/II         | R-A/E   | MSM           | M   | Naïve      | 1,740,000                  | NS                                 |
| BJOX09                                                 | 31 [27, 43]                   | IV           | R-A/E   | MSM           | M   | Naïve      | 77,600                     | NS                                 |
| BJOX18                                                 | 31 [27, 43]                   | IV           | R-A/E   | MSM           | M   | Naïve      | 16,200                     | NS                                 |
| BJOX28                                                 | 19.5 [13, 34]                 | I/II         | R-A/E   | MSM           | M   | Naïve      | 70,200                     | NS                                 |
| BJOX10                                                 | 19.5 [13, 34]                 | I/II         | R-A/E   | MSM           | M   | Naïve      | 19,300                     | NS                                 |
| BJOX12                                                 | 101 [71, 154]                 | V            | R-A/E   | MSM           | M   | Naïve      | 3,330                      | NS                                 |
| BJOX29                                                 | 101 [71, 154]                 | V            | R-B/C   | MSM           | M   | Naïve      | 7,440                      | NS                                 |
| BJOX07                                                 | 101 [71, 154]                 | V            | B       | MSM           | M   | Naïve      | 1,558                      | NS                                 |
| BJOX11                                                 | 101 [71, 154]                 | V            | R-B/C   | MSM           | M   | Naïve      | 11,900                     | NS                                 |
| BJOX31                                                 | 101 [71, 154]                 | V            | R-A/E   | MSM           | M   | Naïve      | 14,700                     | NS                                 |
| BJOX47                                                 | 101 [71, 154]                 | V            | B       | MSM           | M   | Naïve      | 4,480                      | NS                                 |

|                                |               |      |   |     |    |       |            |    |
|--------------------------------|---------------|------|---|-----|----|-------|------------|----|
| BJOX14                         | 101 [71, 154] | V    | B | MSM | M  | Naïve | 2,480,000  | NS |
| BJOX41                         | 101 [71, 154] | V    | B | MSM | M  | Naïve | 6,080      | NS |
| BJOX46                         | 101 [71, 154] | V    | B | MSM | M  | Naïve | 18,700     | NS |
| <u>Masharsky</u> <sup>33</sup> |               |      |   |     |    |       |            |    |
| GU481107-GU481683              |               |      |   |     |    |       |            |    |
| R163                           | 19.5 [13, 34] | I/II | A | IDU | F  | Naïve | 316,228    | NS |
| R392                           | 31 [27, 43]   | IV   | A | IDU | M  | Naïve | 501,187    | NS |
| R497                           | 31 [27, 43]   | IV   | A | IDU | M  | Naïve | 398,107    | NS |
| R575                           | 31 [27, 43]   | IV   | A | IDU | M  | Naïve | 630,957    | NS |
| <u>Manak</u> <sup>34</sup>     |               |      |   |     |    |       |            |    |
| JN687677-JN687847              |               |      |   |     |    |       |            |    |
| BP00002                        | 22 [18, 34]   | II   | C | NS  | M  | Naïve | 553,000    | NS |
| BP00055                        | 22 [18, 34]   | II   | B | NS  | M  | Naïve | 13,200,000 | NS |
| BP00008                        | 101 [71, 154] | V    | C | NS  | M  | Naïve | 471,000    | NS |
| BP00010                        | 101 [71, 154] | V    | C | NS  | M  | Naïve | 112,000    | NS |
| BP00067                        | 101 [71, 154] | V    | B | NS  | M  | Naïve | 199,000    | NS |
| <u>Keele</u> <sup>9</sup>      |               |      |   |     |    |       |            |    |
| EU574937-EU579293              |               |      |   |     |    |       |            |    |
| 1006-11                        | 25 [22, 37]   | III  | B | NS  | M  | NS    | 1,600,000  | NS |
| 1054-07                        | 22 [18, 34]   | II   | B | NS  | M  | NS    | 320,000    | NS |
| 6240-08                        | 22 [18, 34]   | II   | B | NS  | M  | NS    | 120,000    | NS |
| 6244-13                        | 22 [18, 34]   | II   | B | NS  | M  | NS    | 274,000    | NS |
| 9010-09                        | 22 [18, 34]   | II   | B | NS  | F  | NS    | 146,954    | NS |
| 9014-01                        | 22 [18, 34]   | II   | B | NS  | M  | NS    | 25,680     | NS |
| 9015-07                        | 22 [18, 34]   | II   | B | NS  | M  | NS    | 500,000    | NS |
| 9017-01                        | 22 [18, 34]   | II   | B | NS  | M  | NS    | 32,390     | NS |
| 9020-20                        | 22 [18, 34]   | II   | B | NS  | F  | NS    | 69,238     | NS |
| 9021-14                        | 22 [18, 34]   | II   | B | NS  | M  | NS    | 143,379    | NS |
| 9023-21                        | 22 [18, 34]   | II   | B | NS  | M  | NS    | >500,000   | NS |
| 9024-12                        | 22 [18, 34]   | II   | B | NS  | NS | NS    | >500,000   | NS |
| 9025-11                        | 22 [18, 34]   | II   | B | NS  | M  | NS    | >500,000   | NS |
| 9028-07                        | 22 [18, 34]   | II   | B | NS  | F  | NS    | >500,000   | NS |
| 9032-08                        | 25 [22, 37]   | III  | B | NS  | M  | NS    | 40,815     | NS |
| 9033-16                        | 25 [22, 37]   | III  | B | NS  | M  | NS    | 454,553    | NS |
| 9075-03                        | 22 [18, 34]   | II   | B | NS  | NS | NS    | 360,000    | NS |
| 9077-12                        | 22 [18, 34]   | II   | B | NS  | NS | NS    | 158,300    | NS |
| 9079-09                        | 22 [18, 34]   | II   | B | NS  | NS | NS    | 148,320    | NS |

|           |             |     |   |              |    |    |            |    |
|-----------|-------------|-----|---|--------------|----|----|------------|----|
| 61792-03  | 22 [18, 34] | II  | B | NS           | NS | NS | 3,700,000  | NS |
| 62130-04  | 22 [18, 34] | II  | B | NS           | NS | NS | 600,000    | NS |
| 62357-14  | 22 [18, 34] | II  | B | NS           | M  | NS | 302,000    | NS |
| 62995-05  | 17 [13, 28] | I   | B | NS           | NS | NS | 75,000     | NS |
| 63054-04  | 22 [18, 34] | II  | B | NS           | NS | NS | 1,153,260  | NS |
| 63396-07  | 22 [18, 34] | II  | B | NS           | NS | NS | 420,000    | NS |
| PRB926-04 | 22 [18, 34] | II  | B | NS           | NS | NS | 756,060    | NS |
| PRB931-06 | 25 [22, 37] | III | B | NS           | NS | NS | 2,000,000  | NS |
| PRB956-04 | 22 [18, 34] | II  | B | NS           | NS | NS | 600,000    | NS |
| PRB958-06 | 25 [22, 37] | III | B | NS           | NS | NS | 678,900    | NS |
| PRB959-02 | 22 [18, 34] | II  | B | NS           | NS | NS | >2,000,000 | NS |
| SC05      | 22 [18, 34] | II  | B | Heterosexual | M  | NS | 9,980,952  | NS |
| SC11      | 22 [18, 34] | II  | B | Heterosexual | F  | NS | 1,917,073  | NS |
| SC20      | 31 [27, 43] | IV  | B | Heterosexual | M  | NS | 2,789,313  | NS |
| SC45      | 22 [18, 34] | II  | B | Heterosexual | M  | NS | 6,318,529  | NS |
| TRJO4551  | 22 [18, 34] | II  | B | MSM          | M  | NS | 8,121,951  | NS |
| TT29P     | 22 [18, 34] | II  | B | Heterosexual | M  | NS | 14,756,436 | NS |
| WITO4160  | 22 [18, 34] | II  | B | Heterosexual | M  | NS | 325,064    | NS |
| Z05       | 22 [18, 34] | II  | B | Heterosexual | M  | NS | 3,950,942  | NS |
| Z20       | 25 [22, 37] | III | B | MSM          | M  | NS | 13,466,851 | NS |
| Z32       | 31 [27, 43] | IV  | B | MSM          | M  | NS | 5,788,591  | NS |
| Z34       | 25 [22, 37] | III | B | Bisexual     | M  | NS | 2,501,242  | NS |
| 1018-10   | 25 [22, 37] | III | B | NS           | M  | NS | 270,000    | NS |
| 1053-07   | 25 [22, 37] | III | B | NS           | M  | NS | 1,400,000  | NS |
| 6248-07   | 25 [22, 37] | III | B | NS           | M  | NS | 87,700,000 | NS |
| 1001-07   | 25 [22, 37] | III | B | NS           | F  | NS | 210,000    | NS |
| 9022-09   | 25 [22, 37] | III | B | NS           | M  | NS | >500,000   | NS |
| TT35P     | 22 [18, 34] | II  | B | Heterosexual | M  | NS | 1,849,301  | NS |
| 63358-04  | 22 [18, 34] | II  | B | NS           | NS | NS | 260,000    | NS |
| 9031-19   | 31 [27, 43] | IV  | B | NS           | M  | NS | 237,938    | NS |
| 9029-12   | 22 [18, 34] | II  | B | NS           | M  | NS | >500,000   | NS |
| 12007-04  | 22 [18, 34] | II  | B | NS           | NS | NS | 75,815     | NS |
| 1012-11   | 25 [22, 37] | III | B | NS           | M  | NS | 410,000    | NS |
| SC22      | 22 [18, 34] | II  | B | Heterosexual | F  | NS | 14,304,820 | NS |
| 9030-15   | 22 [18, 34] | II  | B | NS           | M  | NS | >500,000   | NS |
| SC31      | 31 [27, 43] | IV  | B | Heterosexual | F  | NS | 4,449,612  | NS |
| 700010058 | 25 [22, 37] | III | B | NS           | M  | NS | 394,649    | NS |

|                               |               |     |   |              |    |       |            |    |
|-------------------------------|---------------|-----|---|--------------|----|-------|------------|----|
| Z33                           | 22 [18, 34]   | II  | B | Bisexual     | M  | NS    | 158,603    | NS |
| Z31                           | 22 [18, 34]   | II  | B | MSM          | M  | NS    | 6,507,075  | NS |
| 63068-05                      | 22 [18, 34]   | II  | B | NS           | NS | NS    | 100,000    | NS |
| TT27P                         | 31 [27, 43]   | IV  | B | Heterosexual | M  | NS    | 1,489,202  | NS |
| 62615-03                      | 22 [18, 34]   | II  | B | NS           | NS | NS    | 2,200,000  | NS |
| Z35                           | 31 [27, 43]   | IV  | B | MSM          | M  | NS    | 2,281,415  | NS |
| 9026-07                       | 25 [22, 37]   | III | B | NS           | NS | NS    | 211,703    | NS |
| 9076-08                       | 25 [22, 37]   | III | B | NS           | NS | NS    | 410,000    | NS |
| SC33                          | 22 [18, 34]   | II  | B | Heterosexual | M  | NS    | 3,277,559  | NS |
| BORI0637                      | 22 [18, 34]   | II  | B | MSM          | M  | NS    | 2,400,000  | NS |
| PRB957-06                     | 22 [18, 34]   | II  | B | NS           | NS | NS    | >2,000,000 | NS |
| 12008-09                      | 22 [18, 34]   | II  | B | NS           | NS | NS    | >2,000,000 | NS |
| SC42                          | 31 [27, 43]   | IV  | B | Heterosexual | M  | NS    | 1,380,000  | NS |
| 9019-03                       | 101 [71, 154] | V   | B | NS           | F  | NS    | 571,000    | NS |
| REJO4541                      | 101 [71, 154] | V   | B | Heterosexual | M  | NS    | 722,349    | NS |
| THRO4156                      | 101 [71, 154] | V   | B | MSM          | M  | NS    | 5,413,140  | NS |
| TT28P                         | 101 [71, 154] | V   | B | Heterosexual | M  | NS    | 7,468,346  | NS |
| TT34P                         | 101 [71, 154] | V   | B | Heterosexual | M  | NS    | 3,050,125  | NS |
| Z02                           | 101 [71, 154] | V   | B | Heterosexual | M  | NS    | 296,111    | NS |
| Z13                           | 101 [71, 154] | V   | B | Heterosexual | M  | NS    | 53,941     | NS |
| Z23                           | 101 [71, 154] | V   | B | Bisexual     | M  | NS    | 210,521    | NS |
| Z27                           | 101 [71, 154] | V   | B | Heterosexual | M  | NS    | 178,125    | NS |
| RHPA4259                      | 101 [71, 154] | V   | B | Heterosexual | F  | NS    | 1,458,354  | NS |
| 63215-03                      | 101 [71, 154] | V   | B | NS           | NS | NS    | 550,000    | NS |
| SC51                          | 101 [71, 154] | V   | B | Heterosexual | M  | Naïve | 4,229,703  | NS |
| MEMI4948                      | 101 [71, 154] | V   | B | MSM          | M  | NS    | 22,686     | NS |
| 700010019                     | 101 [71, 154] | V   | B | IDU          | F  | NS    | 741,499    | NS |
| Z18                           | 101 [71, 154] | V   | B | MSM          | M  | NS    | 2,845,823  | NS |
| CAAN5342                      | 101 [71, 154] | V   | B | MSM          | M  | NS    | 608,560    | NS |
| Z30                           | 101 [71, 154] | V   | B | Heterosexual | F  | NS    | 1,408,114  | NS |
| Z16                           | 101 [71, 154] | V   | B | MSM          | M  | NS    | 2,375,617  | NS |
| Z03                           | 101 [71, 154] | V   | B | MSM          | M  | NS    | 726,859    | NS |
| 701010016                     | 101 [71, 154] | V   | B | NS           | M  | NS    | 1,802      | NS |
| Z29                           | 101 [71, 154] | V   | B | Bisexual     | M  | NS    | 507,401    | NS |
| <u>Abrahams</u> <sup>35</sup> |               |     |   |              |    |       |            |    |
| FJ443128-FJ444362             |               |     |   |              |    |       |            |    |
| 0114                          | 31 [27, 43]   | IV  | C | Heterosexual | M  | NS    | 99,000,000 | NS |

|           |               |      |   |              |   |    |             |    |
|-----------|---------------|------|---|--------------|---|----|-------------|----|
| 0334      | 19.5 [13, 34] | I/II | C | Heterosexual | M | NS | 22,000,000  | NS |
| 0393      | 31 [27, 43]   | IV   | C | Heterosexual | F | NS | 12,000,000  | NS |
| 0478      | 19.5 [13, 34] | I/II | C | Heterosexual | M | NS | 2,166,667   | NS |
| 0595      | 31 [27, 43]   | IV   | C | Heterosexual | F | NS | 1,006,864   | NS |
| 0626      | 31 [27, 43]   | IV   | C | Heterosexual | M | NS | 711,061     | NS |
| 0665      | 31 [27, 43]   | IV   | C | Heterosexual | M | NS | 67,728      | NS |
| 0682      | 19.5 [13, 34] | I/II | C | Heterosexual | M | NS | 17,960      | NS |
| 0985      | 19.5 [13, 34] | I/II | C | Heterosexual | M | NS | 2,894,737   | NS |
| 1086      | 19.5 [13, 34] | I/II | C | Heterosexual | M | NS | 1,409,208   | NS |
| 1172      | 19.5 [13, 34] | I/II | C | Heterosexual | M | NS | 4,805,921   | NS |
| 1176      | 19.5 [13, 34] | I/II | C | Heterosexual | M | NS | 200,000,000 | NS |
| 1196      | 19.5 [13, 34] | I/II | C | Heterosexual | M | NS | 30,500,000  | NS |
| 1335      | 31 [27, 43]   | IV   | C | Heterosexual | M | NS | 576,282     | NS |
| 1373      | 19.5 [13, 34] | I/II | C | Heterosexual | F | NS | 3,221,979   | NS |
| 1394      | 19.5 [13, 34] | I/II | C | Heterosexual | M | NS | 7,341,772   | NS |
| 2010      | 31 [27, 43]   | IV   | C | Heterosexual | M | NS | 1,203,333   | NS |
| 2052      | 19.5 [13, 34] | I/II | C | Heterosexual | F | NS | 339,475     | NS |
| 2060      | 19.5 [13, 34] | I/II | C | Heterosexual | M | NS | 1,530,364   | NS |
| 2103      | 19.5 [13, 34] | I/II | C | Heterosexual | M | NS | 152,364     | NS |
| 703010010 | 25 [22, 37]   | III  | C | Heterosexual | M | NS | 408,727     | NS |
| 703010131 | 25 [22, 37]   | III  | C | Heterosexual | M | NS | 437,369     | NS |
| 703010159 | 22 [18, 34]   | II   | C | Heterosexual | F | NS | 73,453      | NS |
| 703010228 | 31 [27, 43]   | IV   | C | Heterosexual | M | NS | 335,000     | NS |
| 704010083 | 25 [22, 37]   | III  | C | Heterosexual | F | NS | >750,000    | NS |
| 704809221 | 19.5 [13, 34] | I/II | C | Heterosexual | M | NS | >750,000    | NS |
| CAP37     | 31 [27, 43]   | IV   | C | Heterosexual | F | NS | 248,000     | NS |
| CAP63     | 25 [22, 37]   | III  | C | Heterosexual | F | NS | 3,210,000   | NS |
| CAP69     | 19.5 [13, 34] | I/II | C | Heterosexual | F | NS | 15,300      | NS |
| CAP129    | 31 [27, 43]   | IV   | C | Heterosexual | F | NS | 1,800,000   | NS |
| CAP177    | 19.5 [13, 34] | I/II | C | Heterosexual | F | NS | 359,000     | NS |
| CAP188    | 19.5 [13, 34] | I/II | C | Heterosexual | F | NS | 13,800,000  | NS |
| CAP200    | 31 [27, 43]   | IV   | C | Heterosexual | F | NS | 398,000     | NS |
| CAP217    | 31 [27, 43]   | IV   | C | Heterosexual | F | NS | 3,260,000   | NS |
| CAP221    | 19.5 [13, 34] | I/II | C | Heterosexual | F | NS | 24,300      | NS |
| CAP222    | 19.5 [13, 34] | I/II | C | Heterosexual | F | NS | 69,700      | NS |
| CAP225    | 25 [22, 37]   | III  | C | Heterosexual | F | NS | 63,600,000  | NS |
| CAP237    | 25 [22, 37]   | III  | C | Heterosexual | F | NS | 1,020,000   | NS |



|                               |               |      |   |              |    |       |            |       |
|-------------------------------|---------------|------|---|--------------|----|-------|------------|-------|
| 089                           | 101 [71, 154] | V    | C | Heterosexual | M  | NS    | 83,844     | NS    |
| 703010054                     | 101 [71, 154] | V    | C | Heterosexual | M  | NS    | 13,936     | NS    |
| 703010193                     | 101 [71, 154] | V    | C | Heterosexual | M  | NS    | 46,724     | NS    |
| 704010042                     | 101 [71, 154] | V    | C | Heterosexual | M  | NS    | 133,000    | NS    |
| 704810053                     | 101 [71, 154] | V    | C | Heterosexual | F  | NS    | 25,400     | NS    |
| 705010015                     | 101 [71, 154] | V    | C | Heterosexual | F  | NS    | 47,900     | NS    |
| 705010026                     | 101 [71, 154] | V    | C | Heterosexual | F  | NS    | 8,971      | NS    |
| 705010078                     | 101 [71, 154] | V    | C | Heterosexual | M  | NS    | 255,907    | NS    |
| CAP8                          | 101 [71, 154] | V    | C | Heterosexual | F  | NS    | 207,000    | NS    |
| CAP84                         | 101 [71, 154] | V    | C | Heterosexual | F  | NS    | 559,000    | NS    |
| CAP85                         | 101 [71, 154] | V    | C | Heterosexual | F  | NS    | 621,000    | NS    |
| CAP136                        | 101 [71, 154] | V    | C | Heterosexual | F  | NS    | 85,300     | NS    |
| CAP174                        | 101 [71, 154] | V    | C | Heterosexual | F  | NS    | 40,000     | NS    |
| CAP206                        | 101 [71, 154] | V    | C | Heterosexual | F  | NS    | 196,000    | NS    |
| CAP220                        | 101 [71, 154] | V    | C | Heterosexual | F  | NS    | 2,070      | NS    |
| CAP224                        | 101 [71, 154] | V    | C | Heterosexual | F  | NS    | 1,348,000  | NS    |
| CAP260                        | 101 [71, 154] | V    | C | Heterosexual | F  | NS    | 17,600     | NS    |
| <u>Bar</u> <sup>36</sup>      |               |      |   |              |    |       |            |       |
| GU562001-GU562291             |               |      |   |              |    |       |            |       |
| GU938194-GU938295             |               |      |   |              |    |       |            |       |
| HDNDRPI029                    | 31 [27, 43]   | IV   | B | IDU          | F  | NS    | 21,878     | 440   |
| HDNDRPI034                    | 25 [22, 37]   | III  | B | IDU          | M  | NS    | 75,857,758 | 240   |
| CQLDR03                       | 101 [71, 154] | V    | B | IDU          | M  | NS    | 102,329    | NS    |
| HDNDRPI001                    | 101 [71, 154] | V    | B | IDU          | M  | NS    | 870,964    | 690   |
| HDNDRPI032                    | 101 [71, 154] | V    | B | IDU          | M  | NS    | 3,388      | 1,040 |
| HTM319                        | 101 [71, 154] | V    | B | IDU          | M  | NS    | 26,915     | 520   |
| HTM385                        | 101 [71, 154] | V    | B | IDU          | M  | NS    | 234,423    | 406   |
| <u>Heipertz</u> <sup>37</sup> |               |      |   |              |    |       |            |       |
| JX863919-JX864047             |               |      |   |              |    |       |            |       |
| 306159                        | 19.5 [13, 34] | I/II | B | NS           | NS | Naïve | NS         | NS    |
| 306344                        | 19.5 [13, 34] | I/II | B | NS           | NS | Naïve | NS         | NS    |
| 306376                        | 19.5 [13, 34] | I/II | B | NS           | NS | Naïve | NS         | NS    |
| 306512                        | 19.5 [13, 34] | I/II | B | NS           | NS | Naïve | NS         | NS    |
| 306517                        | 19.5 [13, 34] | I/II | B | NS           | NS | Naïve | NS         | NS    |
| <u>Li</u> <sup>38</sup>       |               |      |   |              |    |       |            |       |
| GU330247-GU331770             |               |      |   |              |    |       |            |       |
| INME0632                      | 22 [18, 34]   | II   | B | MSM          | M  | Naïve | 2,217,670  | 739   |

|                                  |               |      |   |              |   |       |             |       |
|----------------------------------|---------------|------|---|--------------|---|-------|-------------|-------|
| HOBRO961                         | 22 [18, 34]   | II   | B | MSM          | M | Naïve | 599,238     | 794   |
| 4013171                          | 31 [27, 43]   | IV   | B | MSM          | M | Naïve | 3,700,000   | 213   |
| 4013211                          | 25 [22, 37]   | III  | B | MSM          | M | Naïve | 19,900,000  | 846   |
| 4013226                          | 22 [18, 34]   | II   | B | MSM          | M | Naïve | 26,700,000  | 175   |
| 4013240                          | 22 [18, 34]   | II   | B | MSM          | M | Naïve | 2,240,000   | 297   |
| 4013242                          | 31 [27, 43]   | IV   | B | MSM          | M | Naïve | 5,790,000   | 251   |
| 4013291                          | 101 [71, 154] | V    | B | MSM          | M | Naïve | 1,490,000   | 179   |
| 4013296                          | 22 [18, 34]   | II   | B | MSM          | M | Naïve | 8,050,000   | 395   |
| 4013321                          | 22 [18, 34]   | II   | B | MSM          | M | Naïve | 6,250,000   | 407   |
| 4013327                          | 31 [27, 43]   | IV   | B | MSM          | M | Naïve | 8,720,000   | 248   |
| 4013383                          | 22 [18, 34]   | II   | B | MSM          | M | Naïve | 584,000     | 531   |
| 4013396                          | 31 [27, 43]   | IV   | B | MSM          | M | Naïve | 1,600,000   | 581   |
| 4013419                          | 22 [18, 34]   | II   | B | MSM          | M | Naïve | 21,200,000  | 226   |
| 4013440                          | 22 [18, 34]   | II   | B | MSM          | M | Naïve | >100,000    | 205   |
| 4013446                          | 25 [22, 37]   | III  | B | MSM          | M | Naïve | >100,000    | 438   |
| 4013448                          | 22 [18, 34]   | II   | B | MSM          | M | Naïve | 28,600,000  | 536   |
| 701010055                        | 22 [18, 34]   | II   | B | MSM          | M | Naïve | 31,513,812  | 432   |
| 701010068                        | 31 [27, 43]   | IV   | B | MSM          | M | Naïve | 3,714,386   | 109   |
| AD17                             | 22 [18, 34]   | II   | B | MSM          | M | Naïve | 47,600,000  | NS    |
| AD75                             | 22 [18, 34]   | II   | B | MSM          | M | Naïve | 21,400,000  | NS    |
| AD83                             | 101 [71, 154] | V    | B | MSM          | M | Naïve | 448,000     | NS    |
| 700010106                        | 22 [18, 34]   | II   | B | MSM          | M | Naïve | 84,545,454  | 277   |
| 701010027                        | 101 [71, 154] | V    | B | MSM          | M | Naïve | 194,744     | 542   |
| 700010246                        | 31 [27, 43]   | IV   | B | MSM          | M | Naïve | 4,395,721   | 1,012 |
| AD77                             | 101 [71, 154] | V    | B | MSM          | M | Naïve | 130,000     | NS    |
| 701010108                        | 101 [71, 154] | V    | B | MSM          | M | Naïve | 14,711      | 592   |
| 700010238                        | 101 [71, 154] | V    | B | MSM          | M | Naïve | 596,908     | 587   |
| <u>Parrish</u> <sup>39, 40</sup> |               |      |   |              |   |       |             |       |
| JQ753730-JQ754304                |               |      |   |              |   |       |             |       |
| JX972238-JX973270                |               |      |   |              |   |       |             |       |
| KC149138-KC156401                |               |      |   |              |   |       |             |       |
| 705010067                        | 19.5 [13, 34] | I/II | C | Heterosexual | F | Naïve | 639,000     | NS    |
| 20258279                         | 31 [27, 43]   | IV   | C | NS           | F | Naïve | 281,838     | NS    |
| 1245045                          | 19.5 [13, 34] | I/II | C | NS           | M | Naïve | 234,068     | NS    |
| 2833264                          | 19.5 [13, 34] | I/II | C | NS           | M | Naïve | 234,423     | NS    |
| 2935054                          | 19.5 [13, 34] | I/II | C | NS           | M | Naïve | >10,000,000 | NS    |

|                                |               |        |             |              |   |                 |            |     |
|--------------------------------|---------------|--------|-------------|--------------|---|-----------------|------------|-----|
| 19157834                       | 19.5 [13, 34] | I/II   | C           | NS           | M | Naïve           | 275,423    | NS  |
| 20927783                       | 19.5 [13, 34] | I/II   | C           | NS           | F | Naïve           | 1,886      | NS  |
| 21197826                       | 19.5 [13, 34] | I/II   | C           | NS           | F | Naïve           | 343,923    | NS  |
| 21283649                       | 19.5 [13, 34] | I/II   | C           | NS           | M | Naïve           | 3,180      | NS  |
| <u>Gnanakaran</u> <sup>8</sup> |               |        |             |              |   |                 |            |     |
| HQ216367-HQ218052              |               |        |             |              |   |                 |            |     |
| HQ238279-HQ238288              |               |        |             |              |   |                 |            |     |
| 701010043                      | 22 [18, 34]   | II     | B           | NS           | F | Naïve           | 5,532      | NS  |
| Z64                            | 31 [27, 43]   | IV     | B           | Heterosexual | M | Naïve           | 11,503,872 | 6   |
| SC24                           | 23.5 [18, 37] | II/III | B           | Heterosexual | M | Naïve           | 523,183    | NS  |
| SC50                           | 23.5 [18, 37] | II/III | B           | Heterosexual | M | Naïve           | 259,747    | NS  |
| FASH1057                       | 22 [18, 34]   | II     | B           | Heterosexual | F | Naïve           | 21,783,636 | NS  |
| 700010224                      | 101 [71, 154] | V      | B           | NS           | M | Naïve           | 300,000    | NS  |
| 701010092                      | 101 [71, 154] | V      | B           | NS           | M | Naïve           | 207,143    | NS  |
| Z75                            | 101 [71, 154] | V      | B           | MSM          | M | Naïve           | 170,826    | 241 |
| Z78                            | 101 [71, 154] | V      | B           | MSM          | M | Naïve           | 750,001    | NS  |
| Z91                            | 101 [71, 154] | V      | B           | MSM          | M | Naïve           | 37,706     | 541 |
| Z92                            | 101 [71, 154] | V      | B           | MSM          | M | Naïve           | 7,633,876  | NS  |
| Z95                            | 101 [71, 154] | V      | B           | Heterosexual | M | Naïve           | 59,603     | 808 |
| <u>Nofemela</u> <sup>41</sup>  |               |        |             |              |   |                 |            |     |
| HQ659584-HQ698053              |               |        |             |              |   |                 |            |     |
| 98                             | 101 [71, 154] | V      | C           | Heterosexual | F | Naïve           | 5,330      | NS  |
| 304                            | 101 [71, 154] | V      | C           | Heterosexual | F | Naïve           | >750,001   | NS  |
| 556                            | 101 [71, 154] | V      | C           | Heterosexual | F | Naïve           | 43,300     | NS  |
| 49                             | 25 [22, 37]   | III    | R-<br>A/C/D | Heterosexual | F | Naïve           | >750,001   | NS  |
| 532                            | 19.5 [13, 34] | I/II   | R-A/D       | Heterosexual | F | Naïve           | >750,001   | NS  |
| 390                            | 101 [71, 154] | V      | C           | Heterosexual | F | Naïve           | >750,001   | NS  |
| <u>Park</u> <sup>29</sup>      |               |        |             |              |   |                 |            |     |
| MF537774-MF538517              |               |        |             |              |   |                 |            |     |
| TY2947                         | [81 – 251]*   | NS     | B           | NS           | F | Naïve           | 920        | 967 |
| RH7057                         | [0 - 146]*    | NS     | B           | NS           | F | Naïve           | 14000      | 700 |
|                                | [188 – 334]*  | NS     | B           | NS           | F | Naïve           | 15000      | 252 |
|                                | [384 – 530]*  | NS     | B           | NS           | F | Experienc<br>ed | 1592       | 328 |
| GE6106                         | [0 – 183]*    | NS     | B           | IDU          | F | Naïve           | NS         | 804 |
|                                | [182 – 365]*  | NS     | B           | IDU          | F | Naïve           | 230        | 510 |

|        |              |    |       |              |   |             |        |      |
|--------|--------------|----|-------|--------------|---|-------------|--------|------|
|        | [350 – 533]* | NS | B     | IDU          | F | Naive       | 190000 | 576  |
| OY9080 | [0 – 187]*   | NS | B     | Heterosexual | F | Naive       | NS     | NS   |
|        | [183 – 370]* | NS | B     | Heterosexual | F | Naive       | 50000  | 585  |
|        | [357 – 544]* | NS | B     | Heterosexual | F | Naive       | 45000  | 573  |
| DA1342 | [0 – 176]*   | NS | B     | NS           | F | Naive       | 12000  | 584  |
|        | [160 – 336]* | NS | B     | NS           | F | Naive       | 20000  | 539  |
|        | [417 – 593]* | NS | B     | NS           | F | Naive       | 10000  | 416  |
| SI1392 | [0 – 134]*   | NS | R-A/G | NS           | F | Naive       | 1280   | 760  |
|        | [431 – 565]* | NS | R-A/G | NS           | F | Naive       | 37000  | 232  |
| JG8930 | [0 – 237]*   | NS | B     | NS           | F | Naive       | 11000  | 908  |
| JY3080 | [0 – 183]*   | NS | B     | NS           | F | Naive       | NS     | NS   |
|        | [182 – 365]* | NS | B     | NS           | F | Naive       | 101925 | 940  |
| XE9655 | [0 - 176]*   | NS | B     | NS           | F | Naive       | NS     | NS   |
| DV6934 | [0 - 245]*   | NS | B     | IDU          | F | Naive       | NS     | 377  |
| NM1689 | [0 – 173]*   | NS | B     | IDU          | F | Naive       | 39000  | 836  |
| SS0342 | [0 - 177]*   | NS | B     | IDU          | F | Naive       | 210000 | 352  |
|        | [160 – 337]* | NS | B     | IDU          | F | Naive       | 15000  | 487  |
|        | [354 – 531]* | NS | B     | IDU          | F | Experienced | 3500   | 614  |
| VE6375 | [0 – 127]*   | NS | B     | IDU          | F | Naive       | 16000  | 403  |
|        | [414 - 541]* | NS | B     | IDU          | F | Naive       | 140    | 260  |
| EJ7211 | [0 – 188]*   | NS | B     | Heterosexual | F | Naive       | NI     | 909  |
|        | [358 – 546]* | NS | B     | Heterosexual | F | Naive       | 2600   | 1220 |
| TI9054 | [0 – 176]*   | NS | B     | NS           | F | Naive       | 5800   | 795  |
|        | [166 – 342]* | NS | B     | NS           | F | Naive       | 19000  | 493  |
|        | [349 – 525]* | NS | B     | NS           | F | Naive       | 17453  | 427  |

**Table S2. Incident Specimens.** 252 Incident specimens with Fiebig stages I, II, III, IV, and V and 31 incident specimens with documented infection of less than 1 year. \*Only HXB2 7134-7499 segment is available. \*The minimum infection duration was the time between the first HIV positive documentation and specimen collection, and the maximum infection duration was the time between the last HIV negative test and specimen collection.

| Subject                                       | Estimated Days Post Infection | Days from First Sample | Fiebig Stage | Subtype | Risk Behaviour | Sex | ART status | Viral Load (RNA copies/ml) | CD4 T cell Count (cells /mm <sup>3</sup> ) |
|-----------------------------------------------|-------------------------------|------------------------|--------------|---------|----------------|-----|------------|----------------------------|--------------------------------------------|
| <u>Baalwa<sup>30</sup>, Yue<sup>31</sup></u>  |                               |                        |              |         |                |     |            |                            |                                            |
| JX877476-JX877521                             |                               |                        |              |         |                |     |            |                            |                                            |
| KP223729-KP223854                             |                               |                        |              |         |                |     |            |                            |                                            |
| KJ190253-KJ190262                             |                               |                        |              |         |                |     |            |                            |                                            |
| 191647                                        | 22 [18, 34]                   | 0                      | II           | D       | Heterosexual   | M   | Naïve      | 242,222                    | NS                                         |
|                                               | 149 [145, 161]                | 127                    | -            | D       | Heterosexual   | M   | Naïve      | 4,470                      | 518                                        |
| R463F                                         | 31 [27, 43]                   | 0                      | IV           | A       | Heterosexual   | F   | Naïve      | 150,000,000                | NS                                         |
|                                               | 38 [34, 50]                   | 7                      | -            | A       | Heterosexual   | F   | Naïve      | 3,980,000                  | 324                                        |
|                                               | 79 [75, 91]                   | 48                     | -            | A       | Heterosexual   | F   | Naïve      | 332,000                    | 427                                        |
|                                               | 198 [194, 210]                | 167                    | -            | A       | Heterosexual   | F   | Naïve      | 398,000                    | 368                                        |
|                                               | 267 [263, 279]                | 236                    | -            | A       | Heterosexual   | F   | Naïve      | 246,000                    | 344                                        |
|                                               | 352 [348, 364]                | 321                    | -            | A       | Heterosexual   | F   | Naïve      | 167,054                    | 375                                        |
| R880F                                         | 25 [22, 37]                   | 0                      | III          | A       | Heterosexual   | F   | Naïve      | 430,843                    | NS                                         |
|                                               | 88 [85, 100]                  | 63                     | -            | A       | Heterosexual   | F   | Naïve      | 2,410                      | 483                                        |
|                                               | 172 [169, 184]                | 147                    | -            | A       | Heterosexual   | F   | Naïve      | 49                         | 742                                        |
|                                               | 256 [253, 268]                | 231                    | -            | A       | Heterosexual   | F   | Naïve      | 49                         | NS                                         |
|                                               | 338 [335, 350]                | 313                    | -            | A       | Heterosexual   | F   | Naïve      | 62                         | 704                                        |
| 9004SS                                        | 31 [27, 43]                   | 0                      | IV           | A       | Heterosexual   | M   | Naïve      | 29,921                     | NS                                         |
|                                               | 60 [56, 72]                   | 29                     | -            | A       | Heterosexual   | M   | Naïve      | 12,323                     | 1,192                                      |
| <u>Herbeck<sup>10</sup>, Liu<sup>11</sup></u> |                               |                        |              |         |                |     |            |                            |                                            |
| DQ853426-DQ854622                             |                               |                        |              |         |                |     |            |                            |                                            |
| PIC11286                                      | 101 [71, 154]                 | 0                      | V            | B       | MSM            | M   | Naïve      | 2,804,000                  | NS                                         |
|                                               | 106 [76,159]                  | 5                      | -            | B       | MSM            | M   | Naïve      | 54,160                     | NS                                         |
|                                               | 114 [84,167]                  | 13                     | -            | B       | MSM            | M   | Naïve      | 29,180                     | NS                                         |
| PIC38051                                      | 17 [13,28]                    | 0                      | I            | B       | MSM            | M   | Naïve      | 620,820                    | NS                                         |
|                                               | 21 [17,32]                    | 4                      | -            | B       | MSM            | M   | Naïve      | 2,498,840                  | NS                                         |
| PIC38417                                      | 101 [71,154]                  | 0                      | V            | B       | MSM            | M   | Naïve      | 472,810                    | NS                                         |
|                                               | 109 [79,162]                  | 8                      | -            | B       | MSM            | M   | Naïve      | 169,580                    | NS                                         |
|                                               | 116 [86,169]                  | 15                     | -            | B       | MSM            | M   | Naïve      | 117,310                    | NS                                         |
|                                               | 129 [99,182]                  | 28                     | -            | B       | MSM            | M   | Naïve      | 71,230                     | NS                                         |
|                                               | 159 [129,212]                 | 58                     | -            | B       | MSM            | M   | Naïve      | 30,650                     | NS                                         |
|                                               | 192 [162,245]                 | 91                     | -            | B       | MSM            | M   | Naïve      | 32,430                     | NS                                         |
|                                               | 220 [190, 273]                | 119                    | -            | B       | MSM            | M   | Naïve      | 24,740                     | NS                                         |

|          |                       |      |   |   |     |   |       |            |     |
|----------|-----------------------|------|---|---|-----|---|-------|------------|-----|
|          | 276 [246,329]         | 175  | - | B | MSM | M | Naïve | 19,460     | NS  |
|          | 323 [293,376]         | 222  | - | B | MSM | M | Naïve | 14,610     | NS  |
| PIC55751 | 101 [71,154]          | 0    | V | B | MSM | M | Naïve | 128,814    | NS  |
|          | 115 [85, 168]         | 14   | - | B | MSM | M | Naïve | 8,469      | NS  |
|          | 3,426 [3396,<br>3479] | 3325 | - | B | MSM | M | Naïve | 40,600     | NS  |
|          | 3,477 [3447,<br>3530] | 3376 | - | B | MSM | M | Naïve | 22,190     | NS  |
| PIC71101 | 17 [13, 28]           | 0    | I | B | MSM | M | Naïve | 377,060    | NS  |
|          | 23 [19, 34]           | 6    | - | B | MSM | M | Naïve | 1,912,200  | NS  |
|          | 31 [27, 42]           | 14   | - | B | MSM | M | Naïve | 312,200    | NS  |
|          | 54 [50, 65]           | 37   | - | B | MSM | M | Naïve | 32,630     | NS  |
|          | 78 [74, 89]           | 61   | - | B | MSM | M | Naïve | 232,050    | NS  |
|          | 106 [102, 117]        | 89   | - | B | MSM | M | Naïve | 109,950    | NS  |
|          | 137 [133, 148]        | 120  | - | B | MSM | M | Naïve | 45,590     | NS  |
|          | 191 [187, 202]        | 174  | - | B | MSM | M | Naïve | 105,870    | NS  |
| PIC83747 | 17 [13, 28]           | 0    | I | B | MSM | M | Naïve | 923        | NS  |
|          | 23 [19, 34]           | 6    | - | B | MSM | M | Naïve | 1,049,870  | NS  |
|          | 31 [27, 42]           | 14   | - | B | MSM | M | Naïve | 26,785,000 | NS  |
|          | 53 [49, 64]           | 36   | - | B | MSM | M | Naïve | 665,680    | NS  |
|          | 59 [55, 70]           | 42   | - | B | MSM | M | Naïve | 668,660    | NS  |
|          | 67 [63, 79]           | 50   | - | B | MSM | M | Naïve | 124,000    | NS  |
|          | 80 [76, 91]           | 63   | - | B | MSM | M | Naïve | 254,300    | NS  |
|          | 109 [105, 120]        | 92   | - | B | MSM | M | Naïve | 151,000    | NS  |
|          | 162 [159, 173]        | 145  | - | B | MSM | M | Naïve | 242,940    | NS  |
|          | 221 [217, 232]        | 204  | - | B | MSM | M | Naïve | 60,950     | NS  |
|          | 284 [280, 295]        | 267  | - | B | MSM | M | Naïve | 51,120     | NS  |
|          | 361 [357, 372]        | 344  | - | B | MSM | M | Naïve | 49,600     | NS  |
| PIC90770 | 17 [13, 28]           | 0    | I | B | MSM | M | Naïve | 469,830    | NS  |
|          | 25 [21, 36]           | 8    | - | B | MSM | M | Naïve | 1600000    | NS  |
|          | 29 [25, 40]           | 12   | - | B | MSM | M | Naïve | 42,810     | NS  |
|          | 85 [81, 96]           | 68   | - | B | MSM | M | Naïve | 12,200     | NS  |
|          | 113 [109, 124]        | 96   | - | B | MSM | M | Naïve | 14,170     | NS  |
|          | 142 [138, 153]        | 125  | - | B | MSM | M | Naïve | 18,210     | NS  |
|          | 210 [206, 221]        | 193  | - | B | MSM | M | Naïve | 70,780     | NS  |
| PIC1362  | 17 [13, 28]           | 0    | I | B | MSM | M | Naïve | 8,240,000  | 876 |
|          | 31 [27, 42]*          | 14   | - | B | MSM | M | Naïve | NS         | NS  |

|                                                      |                     |       |      |   |              |   |       |           |       |
|------------------------------------------------------|---------------------|-------|------|---|--------------|---|-------|-----------|-------|
|                                                      | 59 [55, 70]*        | 42    | -    | B | MSM          | M | Naïve | NS        | NS    |
|                                                      | 122 [118, 133]*     | 105   | -    | B | MSM          | M | Naïve | NS        | NS    |
|                                                      | 164 [160, 175]*     | 147   | -    | B | MSM          | M | Naïve | NS        | NS    |
|                                                      | 199 [195, 210]*     | 182   | -    | B | MSM          | M | Naïve | NS        | NS    |
|                                                      | 353 [349, 364]*     | 336   | -    | B | MSM          | M | Naïve | NS        | NS    |
|                                                      | 590 [586, 601]*     | 573   | -    | B | MSM          | M | Naïve | NS        | NS    |
|                                                      | 778 [774, 789]*     | 761   | -    | B | MSM          | M | Naïve | NS        | NS    |
|                                                      | 835 [831, 846]      | 818   | -    | B | MSM          | M | Naïve | NS        | NS    |
|                                                      | 1,044 [1040, 1055]* | 1,027 | -    | B | MSM          | M | Naïve | NS        | NS    |
|                                                      | 1,256 [1252, 1267]  | 1,239 | -    | B | MSM          | M | Naïve | NS        | NS    |
|                                                      | 1,500 [1496, 1511]* | 1,483 | -    | B | MSM          | M | Naïve | NS        | NS    |
| <u>Parrish</u> <sup>40</sup>                         |                     |       |      |   |              |   |       |           |       |
| KC149138-KC149185                                    |                     |       |      |   |              |   |       |           |       |
| 703010200                                            | 19.5 [13, 34]       | 0     | I/II | C | Heterosexual | M | NS    | 165,501   | NS    |
|                                                      | 26.5 [20, 41]       | 7     | IV   | C | Heterosexual | M | NS    | 128,677   | 111   |
|                                                      | 417.5 [411, 432]    | 398   | -    | C | Heterosexual | M | NS    | 27,882    | NS    |
|                                                      | 704.5 [698, 719]    | 685   | -    | C | Heterosexual | M | NS    | 18,300    | NS    |
| <u>Liu</u> <sup>11</sup> , <u>Keele</u> <sup>9</sup> |                     |       |      |   |              |   |       |           |       |
| <u>Salazar-Gonzalez</u> <sup>42</sup>                |                     |       |      |   |              |   |       |           |       |
| <u>Abrahams</u> <sup>35</sup>                        |                     |       |      |   |              |   |       |           |       |
| DQ853426-DQ854622                                    |                     |       |      |   |              |   |       |           |       |
| EU574937-EU579293                                    |                     |       |      |   |              |   |       |           |       |
| FJ495804-FJ496214                                    |                     |       |      |   |              |   |       |           |       |
| FJ919955-FJ919967                                    |                     |       |      |   |              |   |       |           |       |
| EU578998-EU576521                                    |                     |       |      |   |              |   |       |           |       |
| FJ443128-FJ444362                                    |                     |       |      |   |              |   |       |           |       |
| CAP045                                               | 19.5 [13, 34]       | 0     | I/II | C | Heterosexual | F | Naive | 12,500    | NS    |
|                                                      | 40.5 [34, 55]       | 21    | -    | C | Heterosexual | F | Naive | 236,000   | 974   |
|                                                      | 369.5 [363, 384]    | 350   | -    | C | Heterosexual | F | Naive | 556       | 1,030 |
| CAP210                                               | 19.5 [13, 34]       | 0     | I/II | C | Heterosexual | F | Naive | 468,000   | 332   |
|                                                      | 89.5 [83,104]       | 70    | -    | C | Heterosexual | F | Naive | 50,100    | 543   |
|                                                      | 159.5 [153,174]     | 140   | -    | C | Heterosexual | F | Naive | NS        | NS    |
|                                                      | 187.5 [181, 202]    | 168   | -    | C | Heterosexual | F | Naive | 20,400    | 475   |
| CH040                                                | 22 [18, 34]         | 0     | II   | B | MSM          | M | Naive | 2,197,248 | NS    |

|       |                  |      |      |   |              |   |       |         |     |
|-------|------------------|------|------|---|--------------|---|-------|---------|-----|
|       | 67 [63, 79]      | 45   | -    | B | MSM          | M | Naive | 298,026 | NS  |
|       | 133 [129, 145]   | 111  | -    | B | MSM          | M | Naive | NS      | NS  |
|       | 203 [199, 215]   | 181  | -    | B | MSM          | M | Naive | NS      | NS  |
|       | 434 [430, 446]   | 412  | -    | B | MSM          | M | Naive | NS      | NS  |
| CH042 | 31 [27, 43]      | 0    | IV   | C | NS           | M | Naive | 181,000 | NS  |
|       | 52 [48, 64]      | 21   | -    | C | NS           | M | Naive | 201,000 | 318 |
|       | 91 [87, 103]     | 60   | -    | C | NS           | M | Naive | 128,000 | 350 |
|       | 203 [199, 215]   | 172  | -    | C | NS           | M | Naive | 102,000 | 357 |
|       | 455 [451, 467]   | 424  | -    | C | NS           | M | Naive | 86,400  | 295 |
|       | 707 [703, 719]   | 676  | -    | C | NS           | M | Naive | 267,000 | 349 |
| CH058 | 22 [18, 34]      | 0    | II   | B | MSM          | M | Naive | 92,581  | NS  |
|       | 58 [54, 70]      | 36   | -    | B | MSM          | M | Naive | 394,649 | NS  |
|       | 98 [94, 110]     | 76   | -    | B | MSM          | M | Naive | NS      | NS  |
| CH077 | 19.5 [13, 34]    | 0    | I/II | B | MSM          | M | Naive | NS      | NS  |
|       | 33.5 [27, 48]    | 14   | -    | B | MSM          | M | Naive | NS      | NS  |
|       | 51.5 [45, 66]    | 32   | -    | B | MSM          | M | Naive | NS      | NS  |
|       | 178.5 [172, 193] | 159  | -    | B | MSM          | M | Naive | NS      | NS  |
| CH131 | 19.5 [13, 34]    | 0    | I/II | C | NS           | M | Naive | 411,873 | NS  |
|       | 40.5 [34, 55]    | 21   | -    | C | NS           | M | Naive | 7,764   | NS  |
|       | 47.5 [41, 62]    | 28   | -    | C | NS           | M | Naive | 10,655  | NS  |
|       | 53.5 [47, 68]    | 34   | -    | C | NS           | M | Naive | 53,169  | NS  |
|       | 82.5 [76, 97]    | 63   | -    | C | NS           | M | Naive | 45,697  | NS  |
|       | 110.5 [104, 125] | 91   | -    | C | NS           | M | Naive | 15,424  | NS  |
|       | 194.5 [188, 209] | 175  | -    | C | NS           | M | Naive | 50,709  | 310 |
|       | 292.5 [286, 307] | 273  | -    | C | NS           | M | Naive | 27,446  | 300 |
|       | 352.5 [346, 367] | 333  | -    | C | NS           | M | Naive | 44,488  | 298 |
|       | 689.5 [683, 704] | 670  | -    | C | NS           | M | Naive | 17,807  | 214 |
| CH159 | 19.5 [13, 34]    | 0    | I/II | C | Heterosexual | F | Naive | 17,805  | NS  |
|       | 27.5 [21, 42]    | 8    |      | C | Heterosexual | F | Naive | 587,457 | NS  |
|       | 31.5 [25, 46]    | 12   |      | C | Heterosexual | F | Naive | 570,786 | NS  |
|       | 41.5 [35, 56]    | 22   | -    | C | Heterosexual | F | Naive | 7,101   | NS  |
|       | 48.5 [42, 63]    | 29   | -    | C | Heterosexual | F | Naive | 13,566  | NS  |
|       | 75.5 [69, 90]    | 56   | -    | C | Heterosexual | F | Naive | 9,397   | NS  |
|       | 104.5 [98, 119]  | 85   | -    | C | Heterosexual | F | Naive | 71,474  | 463 |
|       | 321.5 [315, 336] | 302  | -    | C | Heterosexual | F | Naive | 3,722   | 448 |
|       | 667.5 [661, 682] | 648  | -    | C | Heterosexual | F | Naive | <400    | 432 |
|       | 1151.5 [1144.5,  | 1132 | -    | C | Heterosexual | F | Naive | 10,161  | 347 |



|        |                  |     |      |   |              |   |             |             |     |
|--------|------------------|-----|------|---|--------------|---|-------------|-------------|-----|
|        | 1165]            |     |      |   |              |   |             |             |     |
| CH162  | 25 [22, 37]      | 0   | III  | C | NS           | M | Naive       | >10,000,000 | NS  |
|        | 46 [43, 58]      | 21  | -    | C | NS           | M | Naive       | 18,260      | NS  |
|        | 102 [99, 114]    | 77  | -    | C | NS           | M | Naive       | 3,625       | NS  |
|        | 204 [201, 216]   | 179 | -    | C | NS           | M | Naive       | 102,793     | 533 |
|        | 463 [460, 475]   | 438 | -    | C | NS           | M | Naive       | 295,950     | 204 |
| CH164  | 25 [22, 37]      | 0   | III  | C | NS           | M | Naive       | 23,600      | 700 |
|        | 39 [36, 51]      | 14  | -    | C | NS           | M | Naive       | NS          | NS  |
|        | 81 [78, 93]      | 56  | -    | C | NS           | M | Naive       | 7,720       | NS  |
|        | 194 [191, 206]   | 169 | -    | C | NS           | M | Naive       | 12,700      | 449 |
|        | 445 [442, 456]   | 420 | -    | C | NS           | M | Naive       | 750,000     | NS  |
| CH185  | 19.5 [13, 34]    | 0   | I/II | C | Heterosexual | F | Naive       | 20,449      | NS  |
|        | 44.5 [38, 59]    | 25  | -    | C | Heterosexual | F | Naive       | 85,443      | NS  |
|        | 86.5 [80, 101]   | 67  | -    | C | Heterosexual | F | Naive       | 79,706      | NS  |
|        | 199.5 [193, 214] | 180 | -    | C | Heterosexual | F | Naive       | 46,772      | NS  |
|        | 435.5 [429, 450] | 416 | -    | C | Heterosexual | F | Naive       | 234,010     | 311 |
| CH198  | 19.5 [13, 34]    | 0   | I/II | C | Heterosexual | M | Naive       | 14,950,000  | NS  |
|        | 30.5 [24, 45]    | 11  | -    | C | Heterosexual | M | Naive       | 301,401     | 599 |
|        | 79.5 [73, 94]    | 60  | -    | C | Heterosexual | M | Naive       | 2,433       | NS  |
|        | 466.5 [460, 481] | 447 | -    | C | Heterosexual | M | Naive       | 3,476       | NS  |
| CH256  | 19.5 [13, 34]    | 0   | I/II | C | Heterosexual | F | Naive       | 62,060      | NS  |
|        | 47.5 [41, 62]    | 28  | -    | C | Heterosexual | F | Naive       | 46,342      | NS  |
|        | 82.5 [76, 97]    | 63  | -    | C | Heterosexual | F | Naive       | 35,328      | NS  |
|        | 191.5 [185, 206] | 172 | -    | C | Heterosexual | F | Naive       | 13,484      | NS  |
|        | 445.5 [439, 460] | 426 | -    | C | Heterosexual | F | Naive       | 6,183       | 601 |
|        | 703.5 [697, 718] | 684 | -    | C | Heterosexual | F | Naive       | 28,066      | 531 |
| CH470  | 31 [27, 43]      | 0   | IV   | B | NS           | M | Naive       | 84,193      | NS  |
|        | 44 [40, 56]      | 13  | -    | B | NS           | M | Naive       | 264,882     | 324 |
|        | 72 [68, 84]      | 41  | -    | B | NS           | M | Naive       | 27,991      | 522 |
|        | 100 [96, 112]    | 69  | -    | B | NS           | M | Naive       | 27,869      | NS  |
|        | 205 [201, 217]   | 174 | -    | B | NS           | M | Naive       | 28,456      | 554 |
| CAP239 | 101 [71, 154]    | 0   | V    | C | Heterosexual | F | Naive       | 95,800      | 845 |
|        | 220 [190, 273]   | 119 | -    | C | Heterosexual | F | Naive       | 22,400      | 984 |
| CH607  | 31 [27, 43]      | 0   | IV   | B | MSM          | M | Experienced | 8,009       | NS  |
|        | 45 [41, 57]      | 14  |      | B | MSM          | M | Experienced | NS          | NS  |

|                                |                |     |      |   |              |   |             |            |    |
|--------------------------------|----------------|-----|------|---|--------------|---|-------------|------------|----|
|                                | 52 [48, 64]    | 21  |      | B | MSM          | M | Experienced | 24,545     | NS |
| <u>Masharsky</u> <sup>33</sup> |                |     |      |   |              |   |             |            |    |
| GU481107-GU481683              |                |     |      |   |              |   |             |            |    |
| K84                            | 31 [27, 43]    | 0   | IV   | A | IDU          | M | NS          | 251,189    | NS |
|                                | 55 [51, 55]    | 24  | V    | A | IDU          | M | NS          | NS         | NS |
| R053                           | 31 [27, 43]    | 0   | IV   | A | IDU          | F | NS          | 398,107    | NS |
|                                | 39 [35, 51]    | 8   | V    | A | IDU          | F | NS          | NS         | NS |
| R526                           | 19.5 [13, 34]  | 0   | I/II | A | IDU          | M | NS          | 501,187    | NS |
|                                | 84.5 [78, 99]  | 65  | -    | A | IDU          | M | NS          | NS         | NS |
| H386                           | 31 [27, 43]    | 0   | IV   | A | IDU          | F | NS          | 630,957    | NS |
|                                | 40 [36, 52]    | 9   | -    | A | IDU          | F | NS          | NS         | NS |
| H408                           | 25 [22, 37]    | 0   | III  | A | IDU          | M | NS          | NS         | NS |
|                                | 38 [35, 50]    | 13  | IV   | A | IDU          | M | NS          | 251,189    | NS |
| H410                           | 25 [22, 37]    | 0   | III  | A | IDU          | M | NS          | 630,957    | NS |
|                                | 38 [35, 50]    | 13  | IV   | A | IDU          | M | NS          | NS         | NS |
| <u>Keele</u> <sup>9</sup>      |                |     |      |   |              |   |             |            |    |
| EU574937-EU579293              |                |     |      |   |              |   |             |            |    |
| SUMA0874                       | 22 [18, 34]    | 0   | II   | B | MSM          | M | Naive       | NS         | NS |
|                                | 23 [19, 35]    | 1   | II   | B | MSM          | M | Naive       | 939,260    | NS |
|                                | 31 [27, 43]    | 9   | III  | B | MSM          | M | Naive       | 701,640    | NS |
|                                | 38 [34, 50]    | 16  | IV   | B | MSM          | M | Naive       | 106,543    | NS |
|                                | 52 [48, 64]    | 30  | V    | B | MSM          | M | Naive       | 14,780     | NS |
| WEAU0575                       | 22 [18, 34]    | 0   | II   | B | MSM          | M | Naive       | 216,415    | NS |
|                                | 30 [26, 42]    | 8   | IV   | B | MSM          | M | Naive       | 355,360    | NS |
|                                | 37 [33, 49]    | 15  | IV   | B | MSM          | M | Naive       | 100,877    | NS |
|                                | 51 [47, 63]    | 29  | V    | B | MSM          | M | Naive       | 34,737     | NS |
|                                | 219 [215, 231] | 197 | VI   | B | MSM          | M | Naive       | 90,109     | NS |
| 1059                           | 22 [18, 34]    | 0   | II   | B | NS           | M | Naive       | 82,204     | NS |
|                                | 26 [22, 38]    | 4   | II   | B | NS           | M | Naive       | > 100,000  | NS |
|                                | 29 [25, 41]    | 7   | III  | B | NS           | M | Naive       | 2,800,000  | NS |
| 1058                           | 17 [13, 28]    | 0   | I    | B | NS           | M | Naive       | 2,737      | NS |
|                                | 20 [16, 31]    | 3   | II   | B | NS           | M | Naive       | 26,162     | NS |
|                                | 27 [23, 38]    | 10  | IV   | B | NS           | M | Naive       | 550,000    | NS |
| 6247                           | 17 [13, 28]    | 0   | I    | B | NS           | F | NS          | 23,858     | NS |
|                                | 19 [15, 30]    | 2   | II   | B | NS           | F | NS          | 124,000    | NS |
| TT31P                          | 22 [18, 34]    | 0   | II   | B | Heterosexual | F | NS          | 21,826,347 | NS |

|      |             |    |    |   |              |   |    |         |    |
|------|-------------|----|----|---|--------------|---|----|---------|----|
|      | 33 [29, 45] | 11 | IV | B | Heterosexual | F | NS | 59,189  | NS |
| 1051 | 17 [13, 28] | 0  | I  | B | NS           | F | NS | 13,000  | NS |
|      | 27 [23, 38] | 10 | II | B | NS           | F | NS | 280,000 | NS |
| 1056 | 17 [13, 28] | 0  | I  | B | NS           | M | NS | 7,000   | NS |
|      | 20 [16, 31] | 3  | II | B | NS           | M | NS | 65,000  | NS |
|      | 24 [20, 35] | 7  | II | B | NS           | M | NS | 140,000 | NS |

**Table S3. 194 longitudinal specimens from 43 subjects. \*Only HXB2 7134-7499 segment is available.**

| Subject | Minimum Duration of Infection (days) | Subtype    | Sex | Vaccine status | Subject (Reference) | Minimum Duration of Infection (days) | Subtype     | Sex | Vaccine status |
|---------|--------------------------------------|------------|-----|----------------|---------------------|--------------------------------------|-------------|-----|----------------|
| AA001   | 618                                  | CRF01_AE   | M   | placebo        | AA065               | 152                                  | CRF01_AE    | M   | vaccinee       |
| AA002   | 178                                  | CRF01_AE   | M   | placebo        | AA066               | 143                                  | CRF01_AE    | F   | vaccinee       |
| AA003   | 513                                  | CRF01_AE   | M   | placebo        | AA067               | 191                                  | CRF01_AE    | M   | placebo        |
| AA004   | 168                                  | CRF01_AE   | F   | placebo        | AA068               | 170                                  | CRF01_AE    | M   | placebo        |
| AA005   | 203                                  | CRF01_AE   | F   | placebo        | AA070               | 461                                  | CRF01_AE    | F   | vaccinee       |
| AA006   | 511                                  | CRF01_AE   | F   | vaccinee       | AA072               | 184                                  | CRF01_AE    | M   | vaccinee       |
| AA007   | 184                                  | CRF01_AE   | M   | placebo        | AA073               | 182                                  | CRF01_AE    | M   | vaccinee       |
| AA008   | 433                                  | CRF01_AE   | F   | placebo        | AA074               | 163                                  | CRF01_AE    | M   | vaccinee       |
| AA009   | 182                                  | CRF01_AE   | M   | vaccinee       | AA075               | 168                                  | CRF01_AE    | M   | placebo        |
| AA010   | 135                                  | B          | M   | vaccinee       | AA076               | 157                                  | CRF01_AE    | F   | placebo        |
| AA011   | 223                                  | B          | M   | placebo        | AA077               | 189                                  | CRF01_AE    | F   | vaccinee       |
| AA012   | 168                                  | CRF01_AE   | M   | vaccinee       | AA078               | 185                                  | CRF01_AE    | F   | placebo        |
| AA013   | 170                                  | CRF01_AE   | M   | vaccinee       | AA079               | 181                                  | CRF01_AE    | M   | placebo        |
| AA014   | 353                                  | CRF01_AE   | M   | placebo        | AA081               | 20                                   | CRF01_AE    | F   | placebo        |
| AA015   | 196                                  | CRF01_AE   | M   | vaccinee       | AA082               | 183                                  | CRF01_AE    | F   | placebo        |
| AA016   | 191                                  | CRF01_AE   | F   | placebo        | AA083               | 176                                  | CRF01_AE    | F   | placebo        |
| AA017   | 167                                  | CRF01_AE   | M   | placebo        | AA084               | 175                                  | CRF01_AE /B | M   | vaccinee       |
| AA018   | 173                                  | CRF01_AE   | F   | vaccinee       | AA085               | 218                                  | CRF01_AE    | M   | vaccinee       |
| AA019   | 189                                  | CRF01_AE   | M   | placebo        | AA086               | 192                                  | CRF01_AE    | F   | placebo        |
| AA020   | 201                                  | CRF01_AE/B | F   | vaccinee       | AA088               | 168                                  | CRF01_AE    | F   | placebo        |
| AA021   | 169                                  | CRF01_AE   | M   | vaccinee       | AA089               | 180                                  | CRF01_AE    | M   | vaccinee       |
| AA022   | 52                                   | CRF01_AE   | M   | placebo        | AA090               | 336                                  | CRF01_AE    | M   | vaccinee       |
| AA023   | 475                                  | CRF01_AE   | M   | placebo        | AA091               | 209                                  | CRF01_AE    | F   | placebo        |
| AA024   | 181                                  | CRF01_AE   | M   | vaccinee       | AA092               | 173                                  | CRF01_AE    | F   | vaccinee       |
| AA025   | 182                                  | CRF01_AE/B | M   | placebo        | AA093               | 157                                  | B           | M   | vaccinee       |
| AA026   | 176                                  | CRF01_AE   | M   | placebo        | AA094               | 169                                  | CRF01_AE    | M   | placebo        |
| AA027   | 173                                  | CRF01_AE   | F   | placebo        | AA095               | 186                                  | CRF01_AE /B | M   | placebo        |
| AA028   | 222                                  | CRF01_AE   | M   | vaccinee       | AA096               | 177                                  | CRF01_AE /B | F   | vaccinee       |
| AA029   | 168                                  | CRF01_AE   | M   | placebo        | AA097               | 105                                  | CRF01_AE    | M   | vaccinee       |
| AA031   | 183                                  | CRF01_AE   | F   | placebo        | AA098               | 167                                  | CRF01_AE    | M   | placebo        |
| AA032   | 187                                  | CRF01_AE   | F   | placebo        | AA099               | 126                                  | CRF01_AE    | F   | placebo        |
| AA033   | 161                                  | CRF01_AE   | F   | placebo        | AA100               | 182                                  | CRF01_AE    | F   | vaccinee       |
| AA034   | 185                                  | CRF01_AE   | F   | vaccinee       | AA101               | 154                                  | CRF01_AE    | F   | placebo        |

|       |     |          |   |          |       |     |          |   |          |
|-------|-----|----------|---|----------|-------|-----|----------|---|----------|
| AA035 | 203 | CRF01_AE | M | placebo  | AA102 | 126 | CRF01_AE | F | placebo  |
| AA036 | 174 | CRF01_AE | M | vaccinee | AA103 | 168 | CRF01_AE | M | vaccinee |
| AA037 | 272 | CRF01_AE | M | placebo  | AA104 | 154 | CRF01_AE | F | placebo  |
| AA038 | 205 | CRF01_AE | M | placebo  | AA105 | 192 | CRF01_AE | M | placebo  |
| AA039 | 500 | CRF02_AG | F | vaccinee | AA107 | 204 | CRF01_AE | M | placebo  |
| AA040 | 285 | B        | F | placebo  | AA108 | 179 | CRF01_AE | F | vaccinee |
| AA041 | 191 | CRF01_AE | F | placebo  | AA109 | 196 | CRF01_AE | M | placebo  |
| AA042 | 399 | CRF01_AE | M | placebo  | AA110 | 283 | CRF01_AE | F | placebo  |
| AA044 | 191 | CRF01_AE | M | placebo  | AA111 | 178 | CRF01_AE | F | vaccinee |
| AA045 | 183 | CRF01_AE | M | placebo  | AA112 | 175 | CRF01_AE | M | placebo  |
| AA048 | 512 | CRF01_AE | M | vaccinee | AA113 | 147 | CRF01_AE | F | vaccinee |
| AA049 | 179 | CRF01_AE | M | placebo  | AA115 | 183 | B        | M | placebo  |
| AA050 | 208 | CRF01_AE | F | vaccinee | AA116 | 164 | CRF01_AE | M | placebo  |
| AA051 | 179 | CRF01_AE | M | placebo  | AA117 | 178 | CRF01_AE | M | placebo  |
| AA052 | 228 | CRF01_AE | M | vaccinee | AA118 | 181 | CRF01_AE | M | vaccinee |
| AA054 | 168 | CRF01_AE | M | placebo  | AA119 | 161 | CRF01_AE | F | placebo  |
| AA055 | 182 | CRF01_AE | F | vaccinee | AA121 | 154 | CRF01_AE | F | vaccinee |
| AA057 | 156 | CRF01_AE | F | placebo  | AA122 | 168 | CRF01_AE | M | placebo  |
| AA058 | 161 | CRF01_AE | M | vaccinee | AA123 | 182 | CRF01_AE | M | vaccinee |
| AA059 | 164 | CRF01_AE | F | placebo  | AA125 | 162 | CRF01_AE | F | vaccinee |
| AA060 | 170 | CRF01_AE | F | placebo  | AA126 | 78  | CRF01_AE | M | placebo  |
| AA061 | 190 | CRF01_AE | M | vaccinee | AA127 | 156 | CRF01_AE | M | vaccinee |
| AA062 | 158 | CRF01_AE | M | vaccinee | AA129 | 199 | CRF01_AE | F | placebo  |
| AA063 | 182 | CRF01_AE | M | vaccinee | AA130 | 186 | CRF01_AE | M | placebo  |
| AA064 | 167 | CRF01_AE | M | vaccinee | AA131 | 245 | CRF01_AE | M | vaccinee |

**Table S4. 116 incident specimens from RV144 vaccine trial from references, 43, 44, and 45.** Genbank accession numbers are JX446645–JX448316.

|                                              | Full Envelope<br>(547 incident and 149 chronic) | HXB2 7134-7499<br>(585 incident and 305 chronic) |
|----------------------------------------------|-------------------------------------------------|--------------------------------------------------|
| FRR                                          | 1.3% [0% - 4.0%]                                | 1.3% [0% - 3.9%]                                 |
| MDRI                                         | 468 [362 – 628] days                            | 405 [310 – 531] days                             |
| Sensitivity                                  | 94.2% [89.8% – 97.8%]                           | 85.0% [79.1% – 90.8%]                            |
| Prediction error<br>for time since infection | 13.6% [8.1% – 19.5%]                            | 18.1% [12.1% – 24.6%]                            |

**Table S5. HIITE performance from k-fold cross validation.**

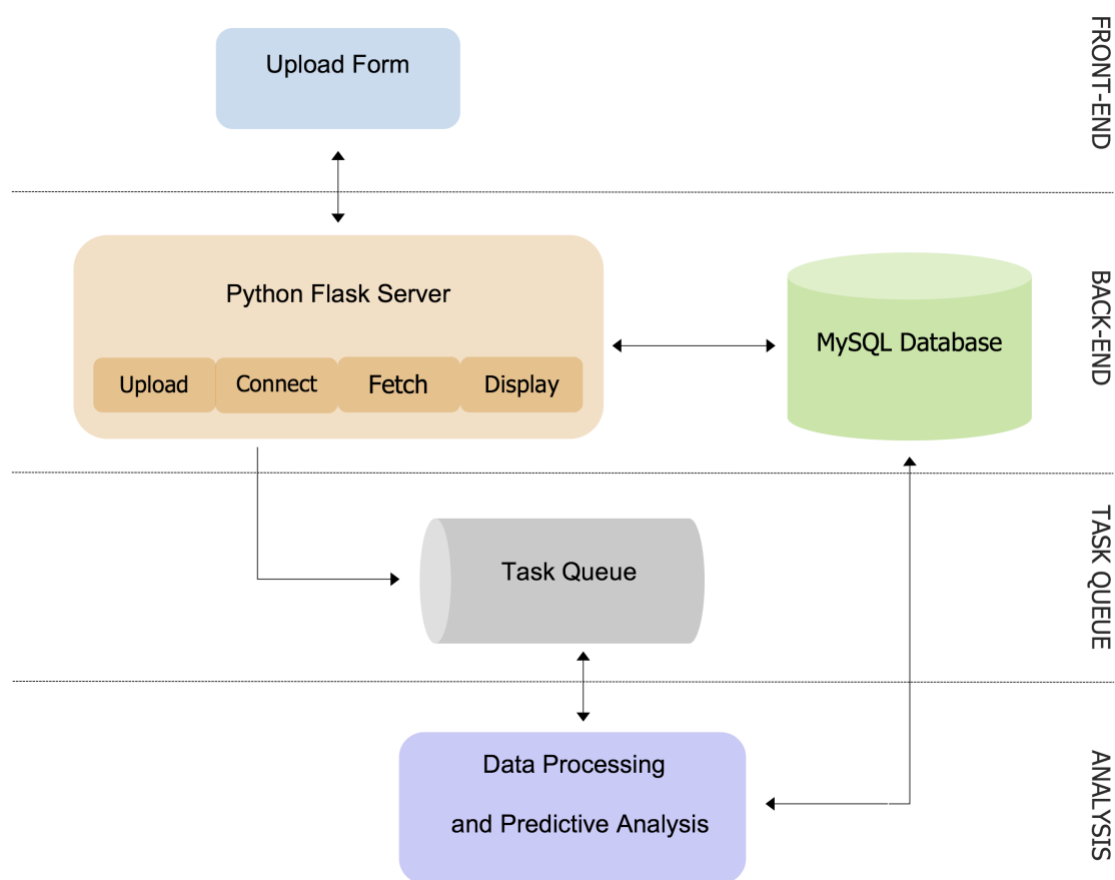

**Figure S1. HIITE’s frontend, backend and database architecture.** The frontend was developed using HTML5 and JavaScript, backend with Python using Flask framework, and database with MySQL. The frontend and backend are interlinked via a set of REST style APIs (Application Programming Interface) accessed over HTTP protocol. The upload API creates a bash file for each request, which is subjected to HIITE task queue and database. The task queue controls the execution of submitted requests and distributes each request into execution loads. The fetch API is invoked when users submit their request. This API polls the database and alerts the user that the request is being processed. Once processing is finished, the display API renders HIITE’s results including the stage of infection (chronic or incident), Hamming distance distribution plot, diversity, GSI, variance, and estimated days’ post infection with a 95% prediction interval for incident stage.

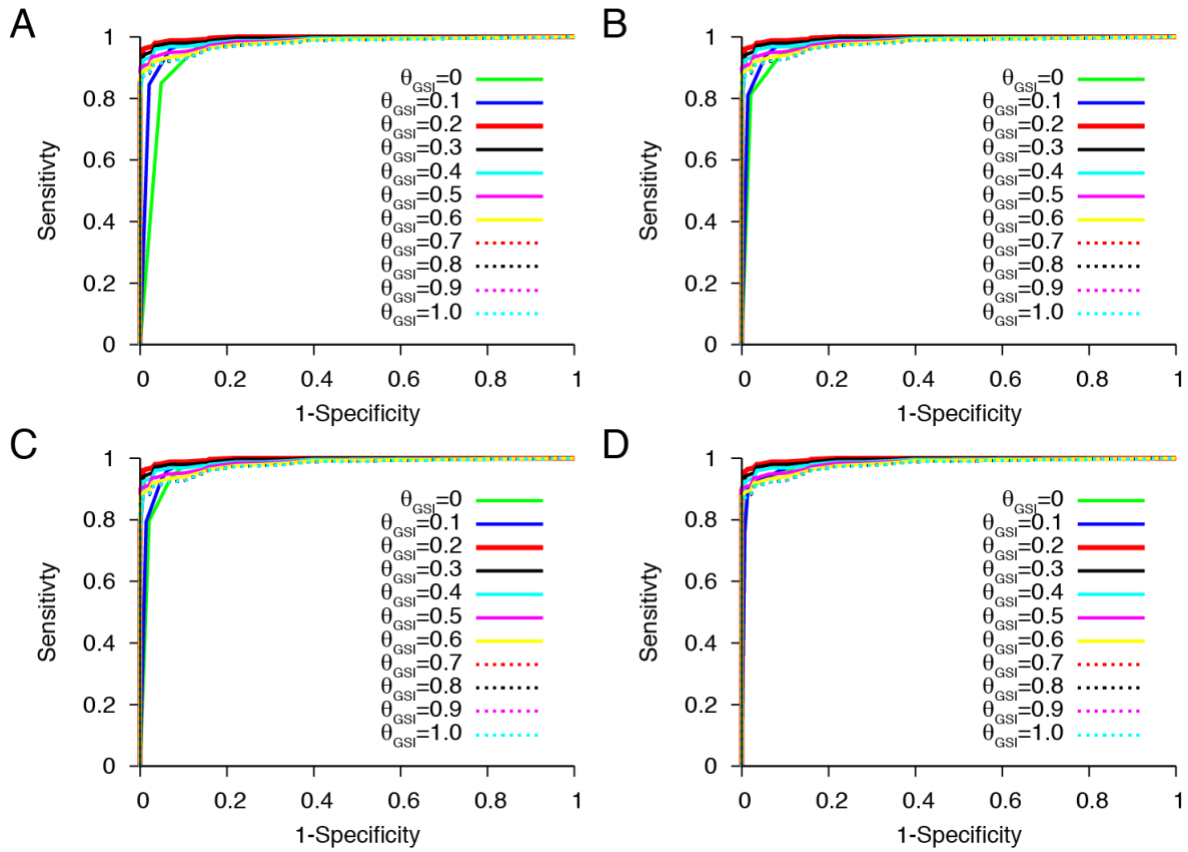

**Figure S2. The receiver operating characteristic (ROC) analysis.** **A.** The ROC curves for  $\theta_\beta = 1$  and  $\theta_{GSI}$  ranging from 0 to 1. The area under the ROC curve was 0.96232 for  $\theta_{GSI} = 0$ , 0.97937 for  $\theta_{GSI} = 0.1$ , 0.99673 for  $\theta_{GSI} = 0.2$ , 0.99414 for  $\theta_{GSI} = 0.3$ , 0.98950 for  $\theta_{GSI} = 0.4$ , 0.985174 for  $\theta_{GSI} = 0.5$ , 0.98185 for  $\theta_{GSI} = 0.6$ , 0.97799 for  $\theta_{GSI} = 0.7$ , 0.97798 for  $\theta_{GSI} = 0.8$ , 0.977954 for  $\theta_{GSI} = 0.9$ , and 0.977954 for  $\theta_{GSI} = 1.0$ . **B.** The ROC curves for  $\theta_\beta = 2$  and  $\theta_{GSI}$  ranging from 0 to 1. The area under the ROC curve was 0.97439 for  $\theta_{GSI} = 0$ , 0.98224 for  $\theta_{GSI} = 0.1$ , 0.99653 for  $\theta_{GSI} = 0.2$ , 0.99398 for  $\theta_{GSI} = 0.3$ , 0.98938 for  $\theta_{GSI} = 0.4$ , 0.98517 for  $\theta_{GSI} = 0.5$ , 0.98185 for  $\theta_{GSI} = 0.6$ , 0.97799 for  $\theta_{GSI} = 0.7$ , 0.97798 for  $\theta_{GSI} = 0.8$ , 0.977954 for  $\theta_{GSI} = 0.9$ , and 0.977954 for  $\theta_{GSI} = 1.0$ . **C.** The ROC curves for  $\theta_\beta = 4$  and  $\theta_{GSI}$  ranging from 0 to 1. The area under the ROC curve was 0.97591 for  $\theta_{GSI} = 0$ , 0.98250 for  $\theta_{GSI} = 0.1$ , 0.99647 for  $\theta_{GSI} = 0.2$ , 0.99395 for  $\theta_{GSI} = 0.3$ , 0.98933 for  $\theta_{GSI} = 0.4$ , 0.98517 for  $\theta_{GSI} = 0.5$ , 0.98185 for  $\theta_{GSI} = 0.6$ , 0.97799 for  $\theta_{GSI} = 0.7$ , 0.97798 for  $\theta_{GSI} = 0.8$ , 0.977954 for  $\theta_{GSI} = 0.9$ , and 0.977954 for  $\theta_{GSI} = 1.0$ . **D.** The ROC curves for  $\theta_\beta = 10$  and  $\theta_{GSI}$  ranging from 0 to 1. The area under the ROC curve was 0.98661 for  $\theta_{GSI} = 0$ , 0.98779 for  $\theta_{GSI} = 0.1$ , 0.99683 for  $\theta_{GSI} = 0.2$ , 0.99437 for  $\theta_{GSI} = 0.3$ , 0.98974 for  $\theta_{GSI} = 0.4$ , 0.98517 for  $\theta_{GSI} = 0.5$ , 0.98185 for  $\theta_{GSI} = 0.6$ , 0.97799 for  $\theta_{GSI} = 0.7$ , 0.97798 for  $\theta_{GSI} = 0.8$ , 0.977954 for  $\theta_{GSI} = 0.9$ , and 0.977954 for  $\theta_{GSI} = 1.0$ .



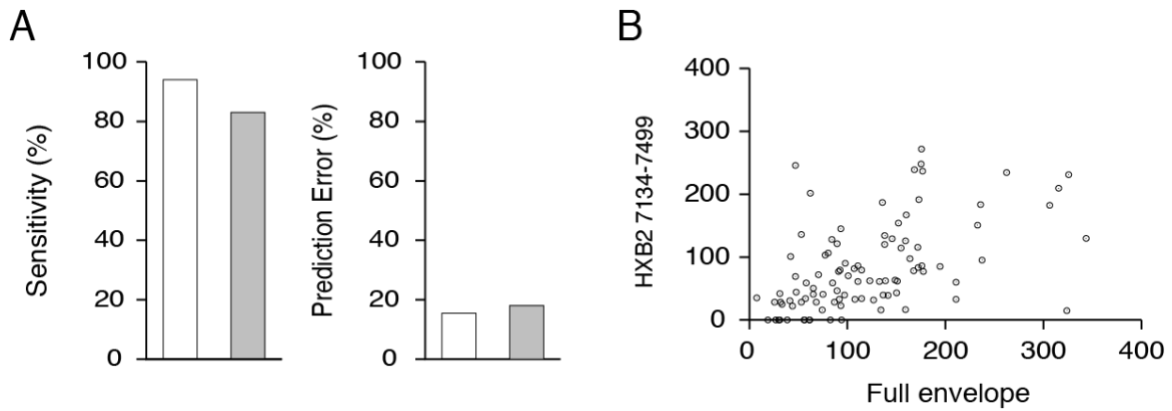

**Figure S3. HIITE’s performance on RV144 trial participants. A.** HIITE’s sensitivity and prediction error for time since infection are measured from 116 RV144 trial subjects’ full envelope gene sequences (white bar) and envelope gene segment HXB2 7134-7499 sequences (grey bar). The sensitivity is defined as the proportion of incident specimens correctly classified as incident. The prediction error denotes the proportion of specimens whose estimated infection time interval deviates from the HIV negative test record. **B.** Time since infection estimates for full envelope gene and those for segment HXB2 7134-7499 of the 96 RV144 subjects. The correlation between the two estimates was statistically significant ( $\rho=0.56$ ,  $p<0.001$ ).

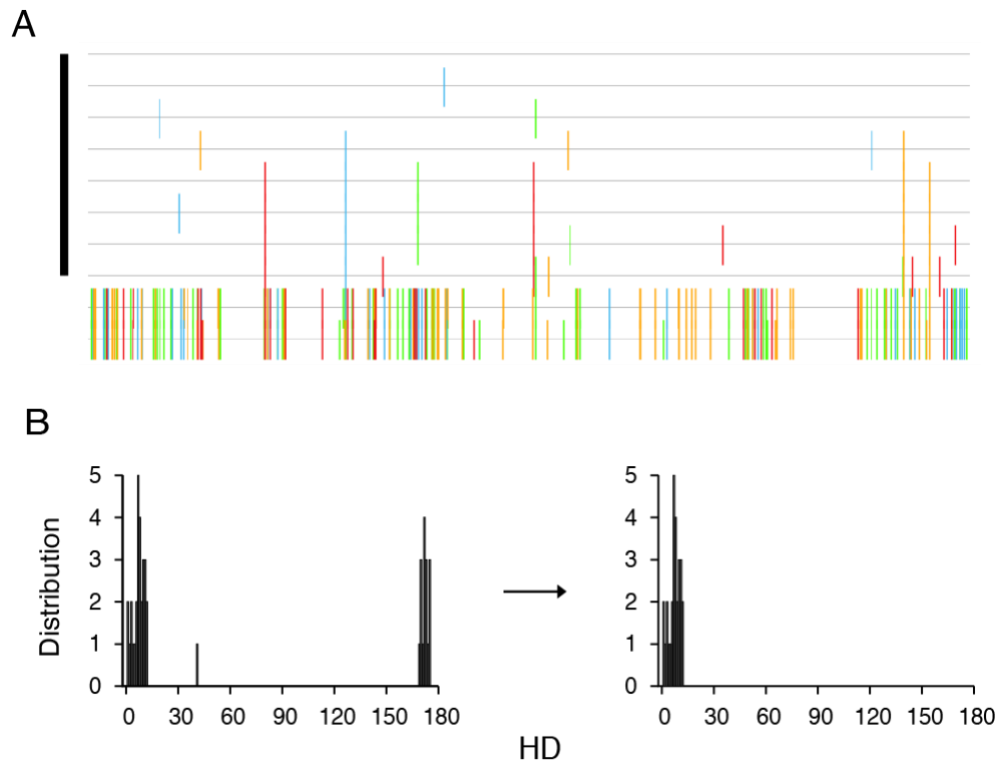

**Figure S4. HIITE's performance on subject AA039 from RV144 vaccine trial. A.** Subject AA039's highlighter plot ([https://www.hiv.lanl.gov/content/sequence/HIGHLIGHT/highlighter\\_top.html](https://www.hiv.lanl.gov/content/sequence/HIGHLIGHT/highlighter_top.html)) shows the signature of multiple founder variants. HIITE successfully clustered subject AA039's sequences into two lineages (major lineage's sequences are marked by a black line), allowing incident classification. HIITE estimated an infection time of 141 [48 – 233] days, conforming with this subject's maximum duration of infection of 500 days. **B.** The distribution of subject AA039's intersequence nucleotide differences (Hamming distance) before clustering and the major lineage's Hamming distance distribution after clustering.

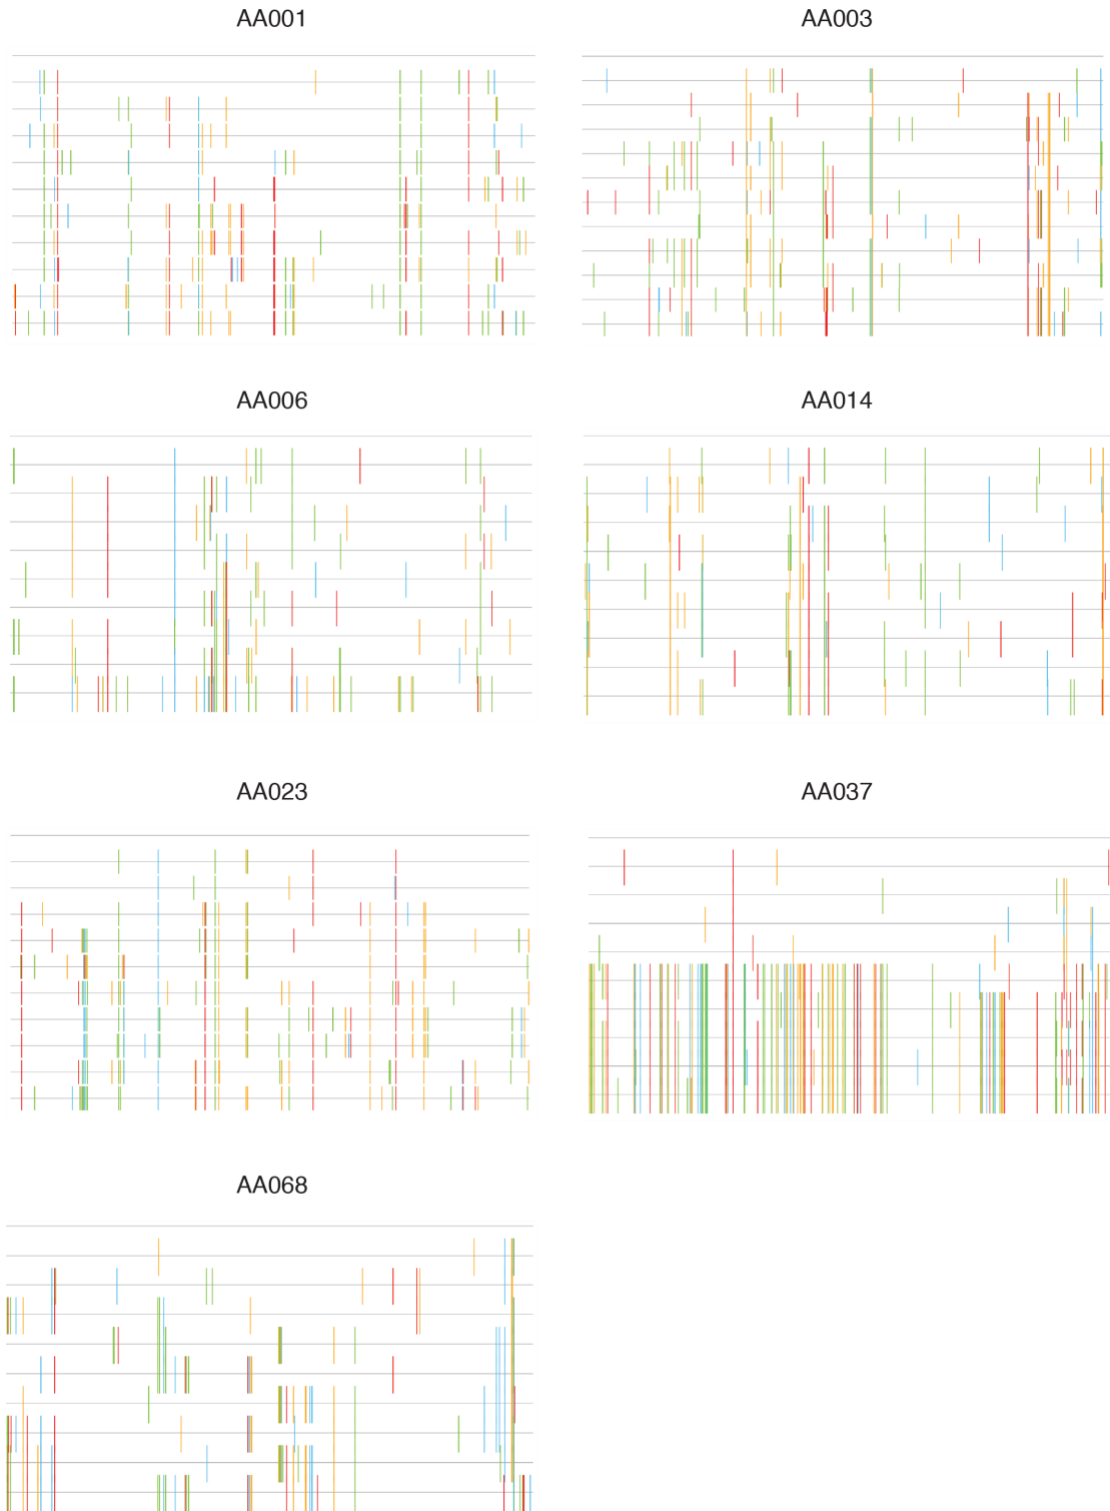

**Figure S5. Highlighter plot for 7 RV144 trial subjects classified as chronic infection.**

The Highlighter tool, [https://www.hiv.lanl.gov/content/sequence/HIGHLIGHT/highlighter\\_top.html](https://www.hiv.lanl.gov/content/sequence/HIGHLIGHT/highlighter_top.html), was used.

## REFERENCES

1. Bailey JR, Lassen KG, Yang HC, et al. Neutralizing antibodies do not mediate suppression of human immunodeficiency virus type 1 in elite suppressors or selection of plasma virus variants in patients on highly active antiretroviral therapy. *J Virol* 2006; **80**(10): 4758-70.
2. Yoshida I, Sugiura W, Shibata J, Ren F, Yang Z, Tanaka H. Change of positive selection pressure on HIV-1 envelope gene inferred by early and recent samples. *PLoS One* 2011; **6**(4): e18630.
3. Ren C, Liu S, Li Y, et al. Cross-neutralizing antibody profile of Chinese HIV-1-infected individuals and the viral envelope features from elite neutralizers. *J Acquir Immune Defic Syndr* 2014; **67**(5): 472-80.
4. Rong R, Li B, Lynch RM, et al. Escape from autologous neutralizing antibodies in acute/early subtype C HIV-1 infection requires multiple pathways. *PLoS Pathog* 2009; **5**(9): e1000594.
5. Bunnik EM, Pisas L, van Nuenen AC, Schuitemaker H. Autologous neutralizing humoral immunity and evolution of the viral envelope in the course of subtype B human immunodeficiency virus type 1 infection. *J Virol* 2008; **82**(16): 7932-41.
6. Edo-Matas D, Lemey P, Tom JA, et al. Impact of CCR5delta32 host genetic background and disease progression on HIV-1 intrahost evolutionary processes: efficient hypothesis testing through hierarchical phylogenetic models. *Mol Biol Evol* 2011; **28**(5): 1605-16.
7. van Gils MJ, Bunnik EM, Burger JA, et al. Rapid escape from preserved cross-reactive neutralizing humoral immunity without loss of viral fitness in HIV-1-infected progressors and long-term nonprogressors. *J Virol* 2010; **84**(7): 3576-85.
8. Gnanakaran S, Bhattacharya T, Daniels M, et al. Recurrent signature patterns in HIV-1 B clade envelope glycoproteins associated with either early or chronic infections. *PLoS Pathog* 2011; **7**(9): e1002209.
9. Keele BF, Giorgi EE, Salazar-Gonzalez JF, et al. Identification and characterization of transmitted and early founder virus envelopes in primary HIV-1 infection. *Proc Natl Acad Sci U S A* 2008; **105**(21): 7552-7.
10. Herbeck JT, Rolland M, Liu Y, et al. Demographic processes affect HIV-1 evolution in primary infection before the onset of selective processes. *J Virol* 2011; **85**(15): 7523-34.
11. Liu Y, McNevin J, Cao J, et al. Selection on the human immunodeficiency virus type 1 proteome following primary infection. *J Virol* 2006; **80**(19): 9519-29.
12. Daniels RS, Wilson P, Patel D, Longhurst H, Patterson S. Analysis of full-length HIV type 1 env genes indicates differences between the virus infecting T cells and dendritic cells in peripheral blood of infected patients. *AIDS Res Hum Retroviruses* 2004; **20**(4): 409-13.
13. Doria-Rose NA, Schramm CA, Gorman J, et al. Developmental pathway for potent V1V2-directed HIV-neutralizing antibodies. *Nature* 2014; **509**(7498): 55-62.
14. Wu X, Wang C, O'Dell S, et al. Selection pressure on HIV-1 envelope by broadly neutralizing antibodies to the conserved CD4-binding site. *J Virol* 2012; **86**(10): 5844-56.

15. Blish CA, Dogan OC, Derby NR, et al. Human immunodeficiency virus type 1 superinfection occurs despite relatively robust neutralizing antibody responses. *J Virol* 2008; **82**(24): 12094-103.
16. Piantadosi A, Chohan B, Chohan V, McClelland RS, Overbaugh J. Chronic HIV-1 infection frequently fails to protect against superinfection. *PLoS Pathog* 2007; **3**(11): e177.
17. Geels MJ, Cornelissen M, Schuitemaker H, et al. Identification of sequential viral escape mutants associated with altered T-cell responses in a human immunodeficiency virus type 1-infected individual. *J Virol* 2003; **77**(23): 12430-40.
18. Sturdevant CB, Joseph SB, Schnell G, Price RW, Swanstrom R, Spudich S. Compartmentalized replication of R5 T cell-tropic HIV-1 in the central nervous system early in the course of infection. *PLoS Pathog* 2015; **11**(3): e1004720.
19. Ssemwanga D, Lyagoba F, Ndemi N, et al. Multiple HIV-1 infections with evidence of recombination in heterosexual partnerships in a low risk Rural Clinical Cohort in Uganda. *Virology* 2011; **411**(1): 113-31.
20. Skar H, Gutenkunst RN, Wilbe Ramsay K, Alaeus A, Albert J, Leitner T. Daily sampling of an HIV-1 patient with slowly progressing disease displays persistence of multiple env subpopulations consistent with neutrality. *PLoS One* 2011; **6**(8): e21747.
21. Ping LH, Joseph SB, Anderson JA, et al. Comparison of viral Env proteins from acute and chronic infections with subtype C human immunodeficiency virus type 1 identifies differences in glycosylation and CCR5 utilization and suggests a new strategy for immunogen design. *J Virol* 2013; **87**(13): 7218-33.
22. Mukhopadhyay S, Ringe R, Patil A, Paranjape R, Bhattacharya J. Characterization of circulating HIV type 1 env genes in plasma of two antiretroviral-naive slow progressing patients with broad neutralizing antibody response with evidence of recombination. *AIDS Res Hum Retroviruses* 2012; **28**(7): 739-45.
23. Malherbe DC, Pissani F, Sather DN, et al. Envelope variants circulating as initial neutralization breadth developed in two HIV-infected subjects stimulate multiclade neutralizing antibodies in rabbits. *J Virol* 2014; **88**(22): 12949-67.
24. Evering TH, Kamau E, St Bernard L, Farmer CB, Kong XP, Markowitz M. Single genome analysis reveals genetic characteristics of Neuroadaptation across HIV-1 envelope. *Retrovirology* 2014; **11**: 65.
25. Shankarappa R, Margolick JB, Gange SJ, et al. Consistent viral evolutionary changes associated with the progression of human immunodeficiency virus type 1 infection. *J Virol* 1999; **73**(12): 10489-502.
26. Jensen MA, Li FS, van 't Wout AB, et al. Improved coreceptor usage prediction and genotypic monitoring of R5-to-X4 transition by motif analysis of human immunodeficiency virus type 1 env V3 loop sequences. *J Virol* 2003; **77**(24): 13376-88.
27. Park SY, Goeken N, Lee HJ, Bolan R, Dube MP, Lee HY. Developing high-throughput HIV incidence assay with pyrosequencing platform. *J Virol* 2014; **88**(5): 2977-90.
28. Liao HX, Lynch R, Zhou T, et al. Co-evolution of a broadly neutralizing HIV-1 antibody and founder virus. *Nature* 2013; **496**(7446): 469-76.
29. Park SY, Love TM, Reynell L, et al. The HIV Genomic Incidence Assay Meets False Recency Rate and Mean Duration of Recency Infection Performance Standards. *Scientific Reports* 2017; **7**(1): 7480.

30. Baalwa J, Wang S, Parrish NF, et al. Molecular identification, cloning and characterization of transmitted/founder HIV-1 subtype A, D and A/D infectious molecular clones. *Virology* 2013; **436**(1): 33-48.
31. Yue L, Pfafferoth KJ, Baalwa J, et al. Transmitted virus fitness and host T cell responses collectively define divergent infection outcomes in two HIV-1 recipients. *PLoS Pathog* 2015; **11**(1): e1004565.
32. Chen Y, Li N, Zhang T, et al. Comprehensive Characterization of the Transmitted/Founder env Genes From a Single MSM Cohort in China. *J Acquir Immune Defic Syndr* 2015; **69**(4): 403-12.
33. Masharsky AE, Dukhovlinova EN, Verevochkin SV, et al. A substantial transmission bottleneck among newly and recently HIV-1-infected injection drug users in St Petersburg, Russia. *J Infect Dis* 2010; **201**(11): 1697-702.
34. Manak M, Sina S, Anekella B, et al. Pilot studies for development of an HIV subtype panel for surveillance of global diversity. *AIDS Res Hum Retroviruses* 2012; **28**(6): 594-606.
35. Abrahams MR, Anderson JA, Giorgi EE, et al. Quantitating the multiplicity of infection with human immunodeficiency virus type 1 subtype C reveals a non-poisson distribution of transmitted variants. *J Virol* 2009; **83**(8): 3556-67.
36. Bar KJ, Li H, Chamberland A, et al. Wide variation in the multiplicity of HIV-1 infection among injection drug users. *J Virol* 2010; **84**(12): 6241-7.
37. Heipertz RA, Jr., Sanders-Buell E, Kijak G, et al. Molecular epidemiology of early and acute HIV type 1 infections in the United States Navy and Marine Corps, 2005-2010. *AIDS Res Hum Retroviruses* 2013; **29**(10): 1310-20.
38. Li H, Bar KJ, Wang S, et al. High Multiplicity Infection by HIV-1 in Men Who Have Sex with Men. *PLoS Pathog* 2010; **6**(5): e1000890.
39. Parrish NF, Wilen CB, Banks LB, et al. Transmitted/founder and chronic subtype C HIV-1 use CD4 and CCR5 receptors with equal efficiency and are not inhibited by blocking the integrin alpha4beta7. *PLoS Pathog* 2012; **8**(5): e1002686.
40. Parrish NF, Gao F, Li H, et al. Phenotypic properties of transmitted founder HIV-1. *Proc Natl Acad Sci U S A* 2013; **110**(17): 6626-33.
41. Nofemela A, Bandawe G, Thebus R, et al. Defining the human immunodeficiency virus type 1 transmission genetic bottleneck in a region with multiple circulating subtypes and recombinant forms. *Virology* 2011; **415**(2): 107-13.
42. Salazar-Gonzalez JF, Salazar MG, Keele BF, et al. Genetic identity, biological phenotype, and evolutionary pathways of transmitted/founder viruses in acute and early HIV-1 infection. *J Exp Med* 2009; **206**(6): 1273-89.
